# Supplementary material for: Gene signature of children with severe respiratory syncytial virus infection
Source: PubMed Central journal article supplement (PMC8249238; doi:10.1038/s41390-020-01347-9), 2021-01-28

Supplementary Figure S1. PCA by WHO LRTI

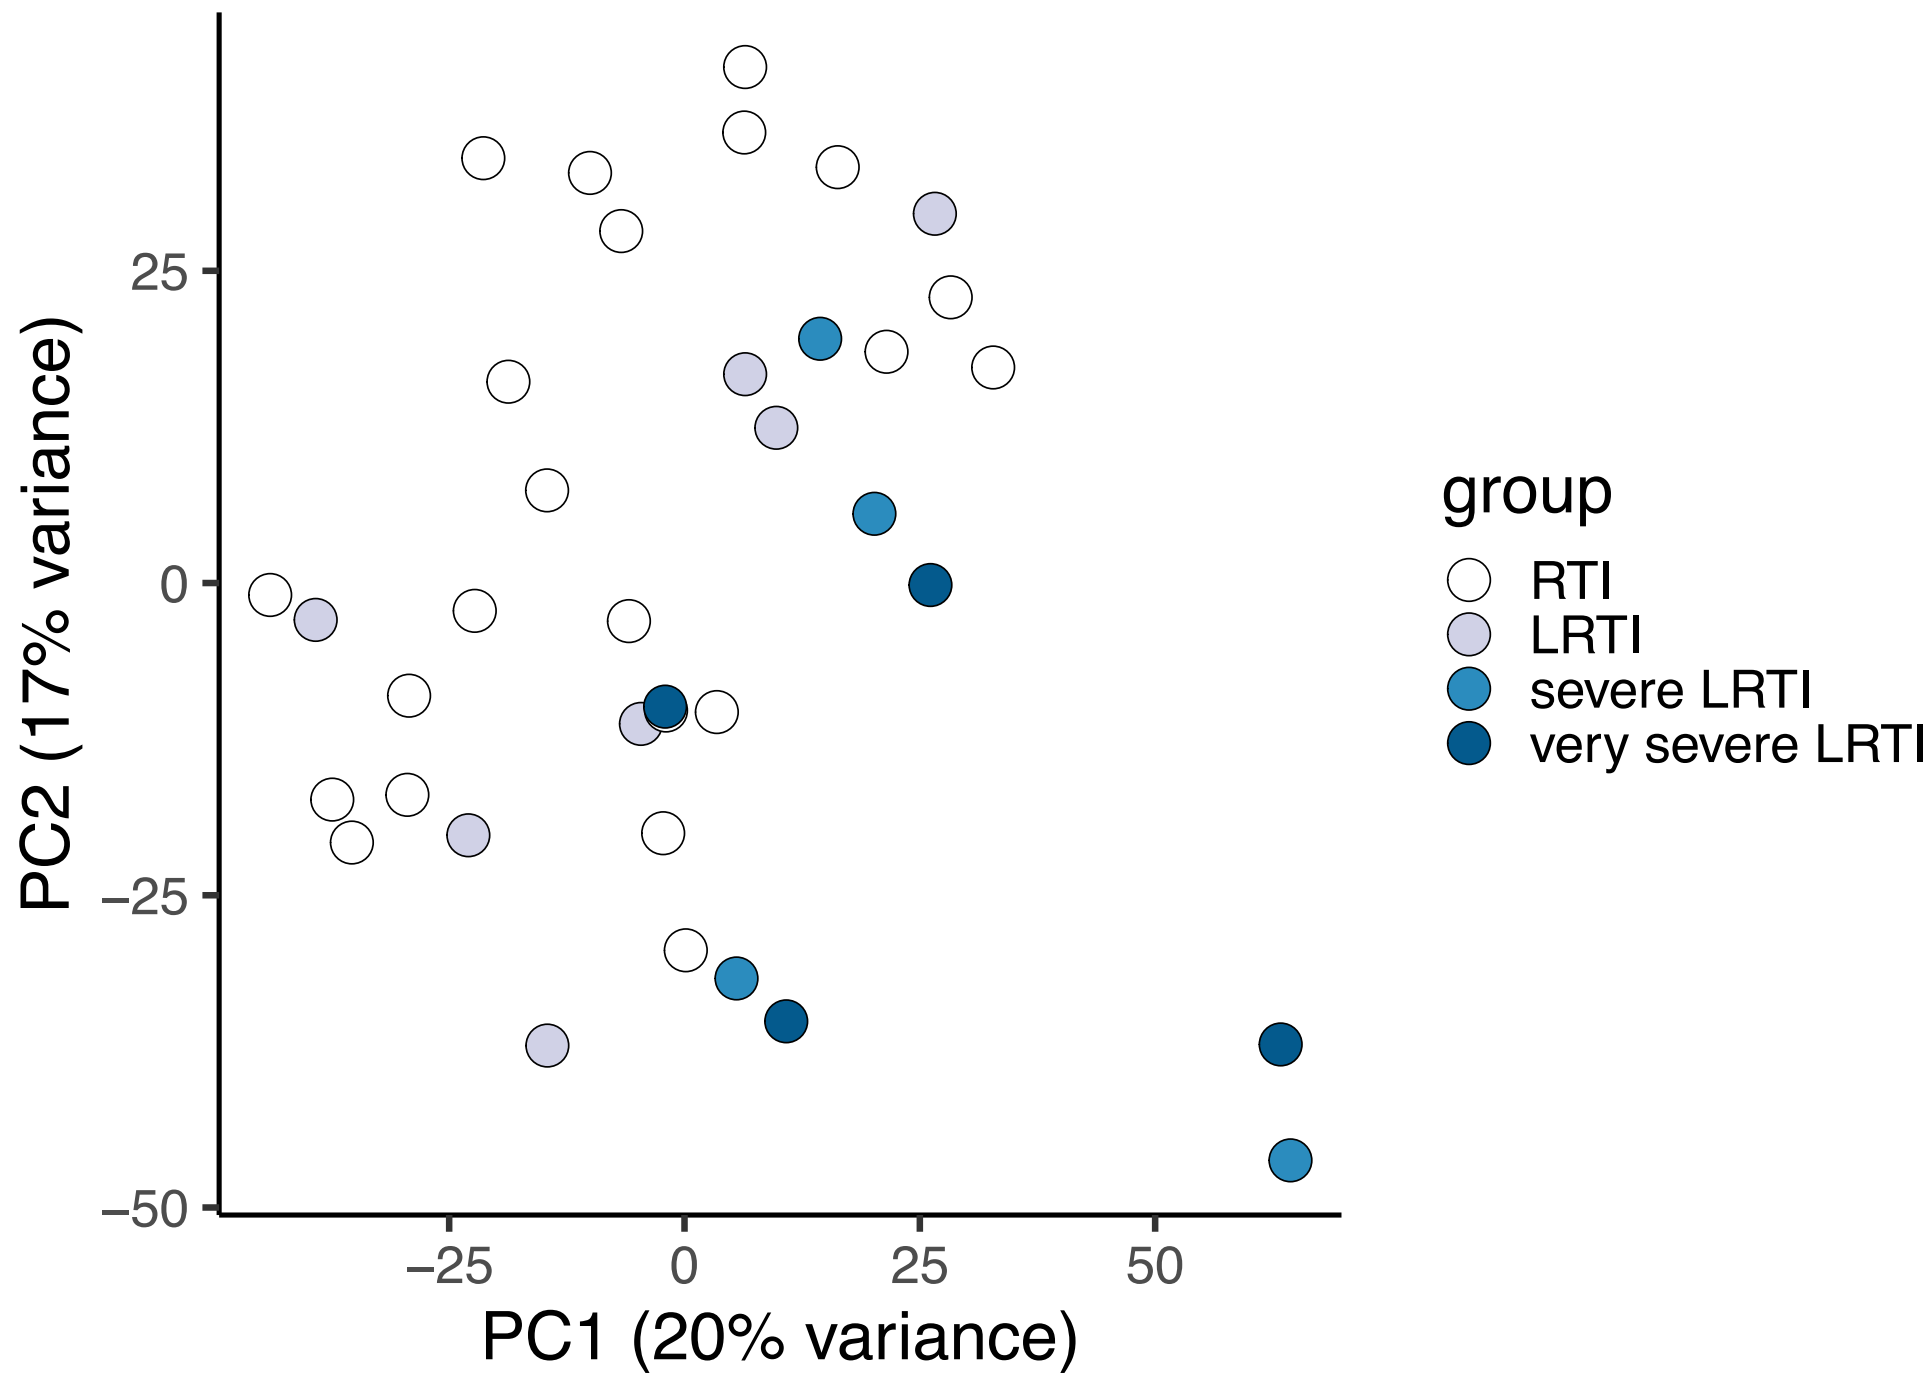

Supplementary Figure S1. PCA by year of enrollment

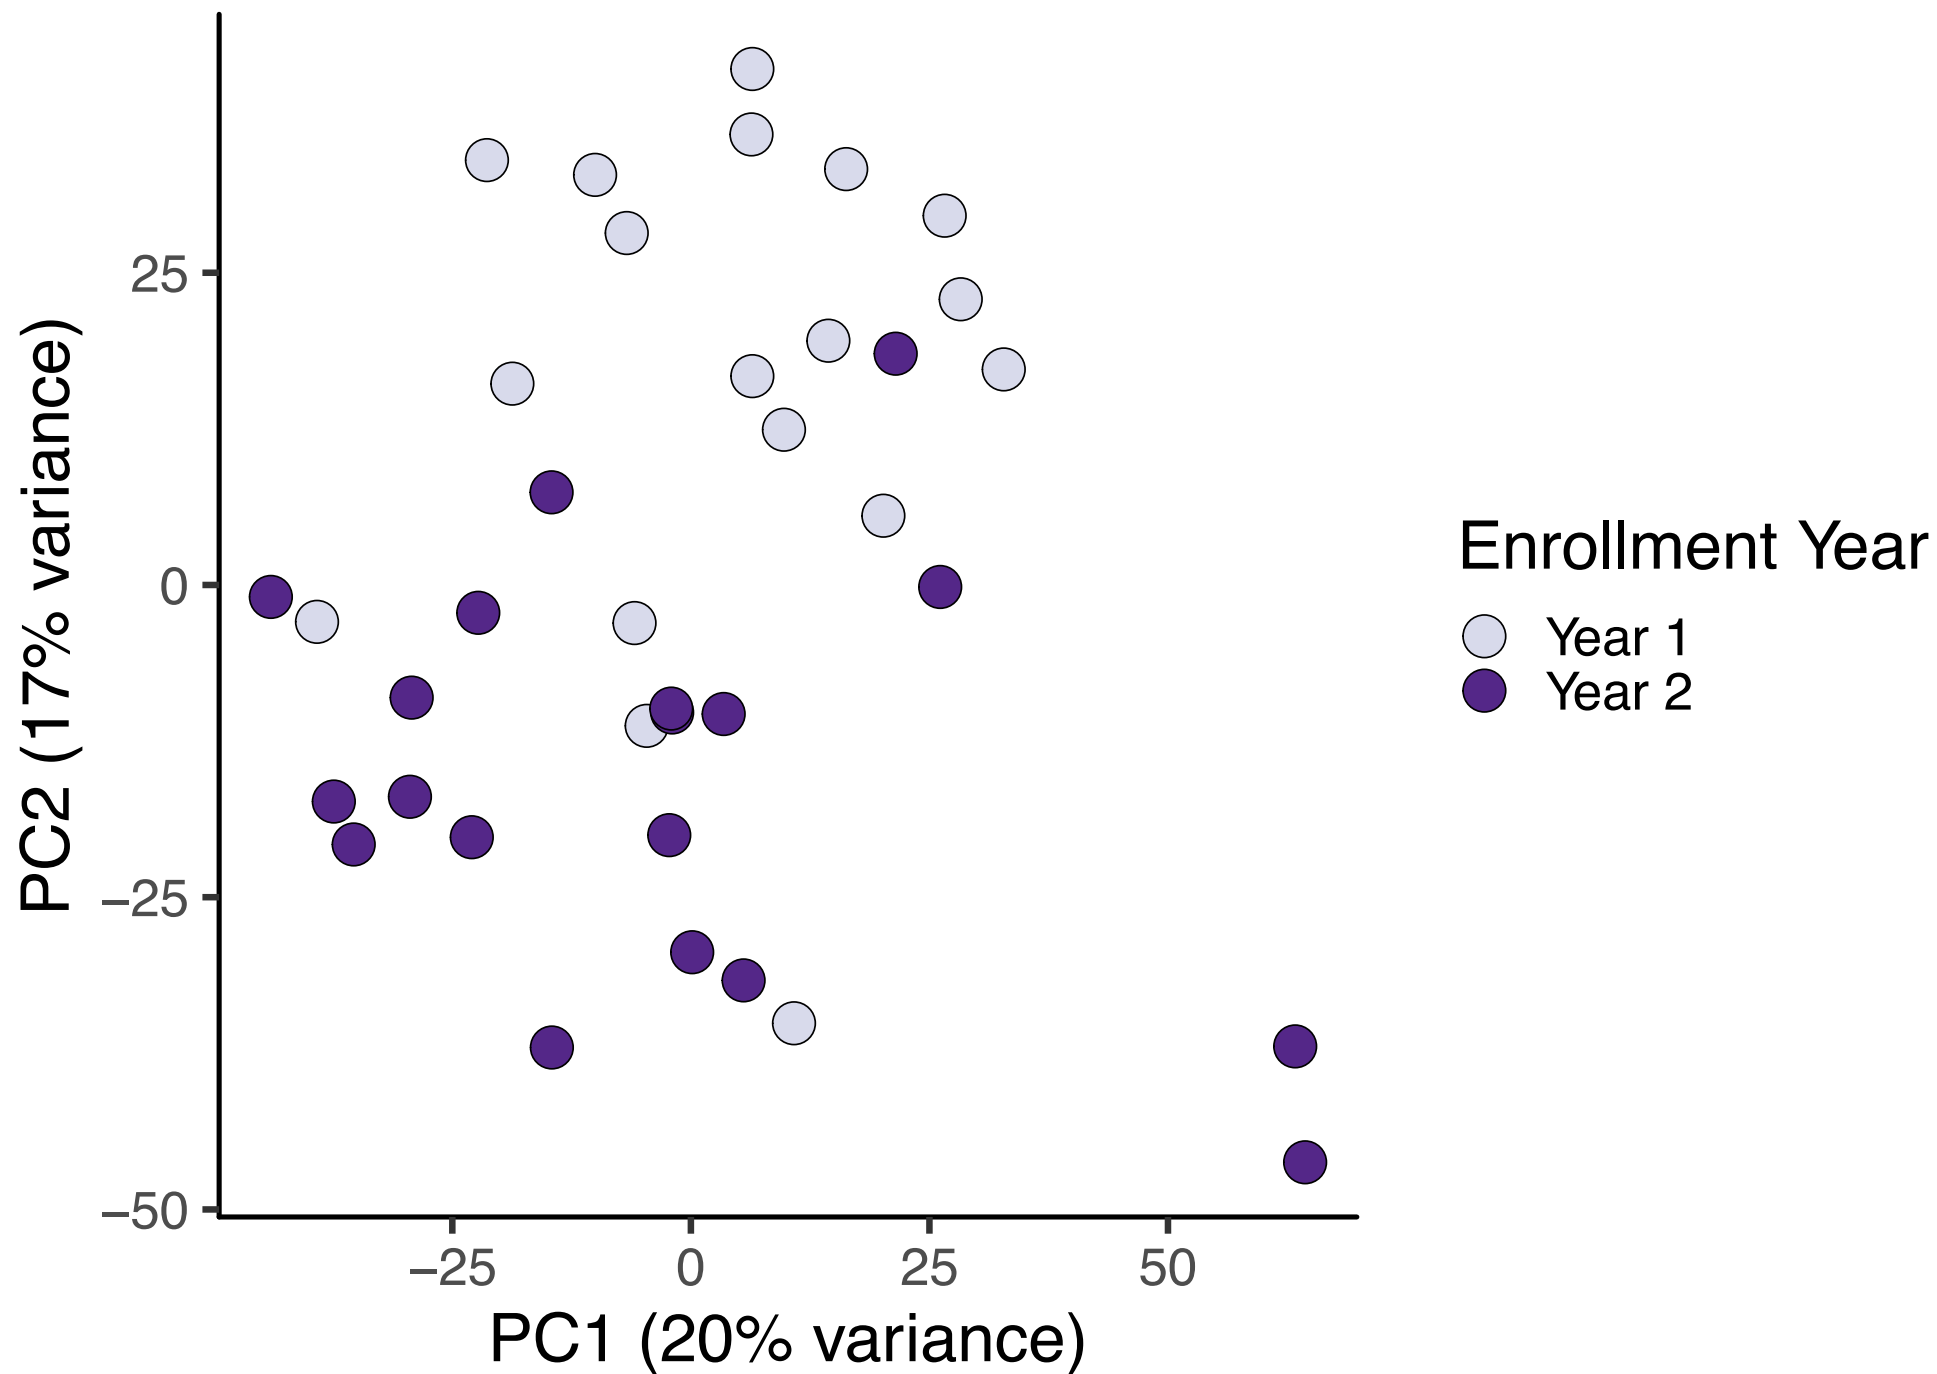

Supplementary Figure S1. PCA by hospital

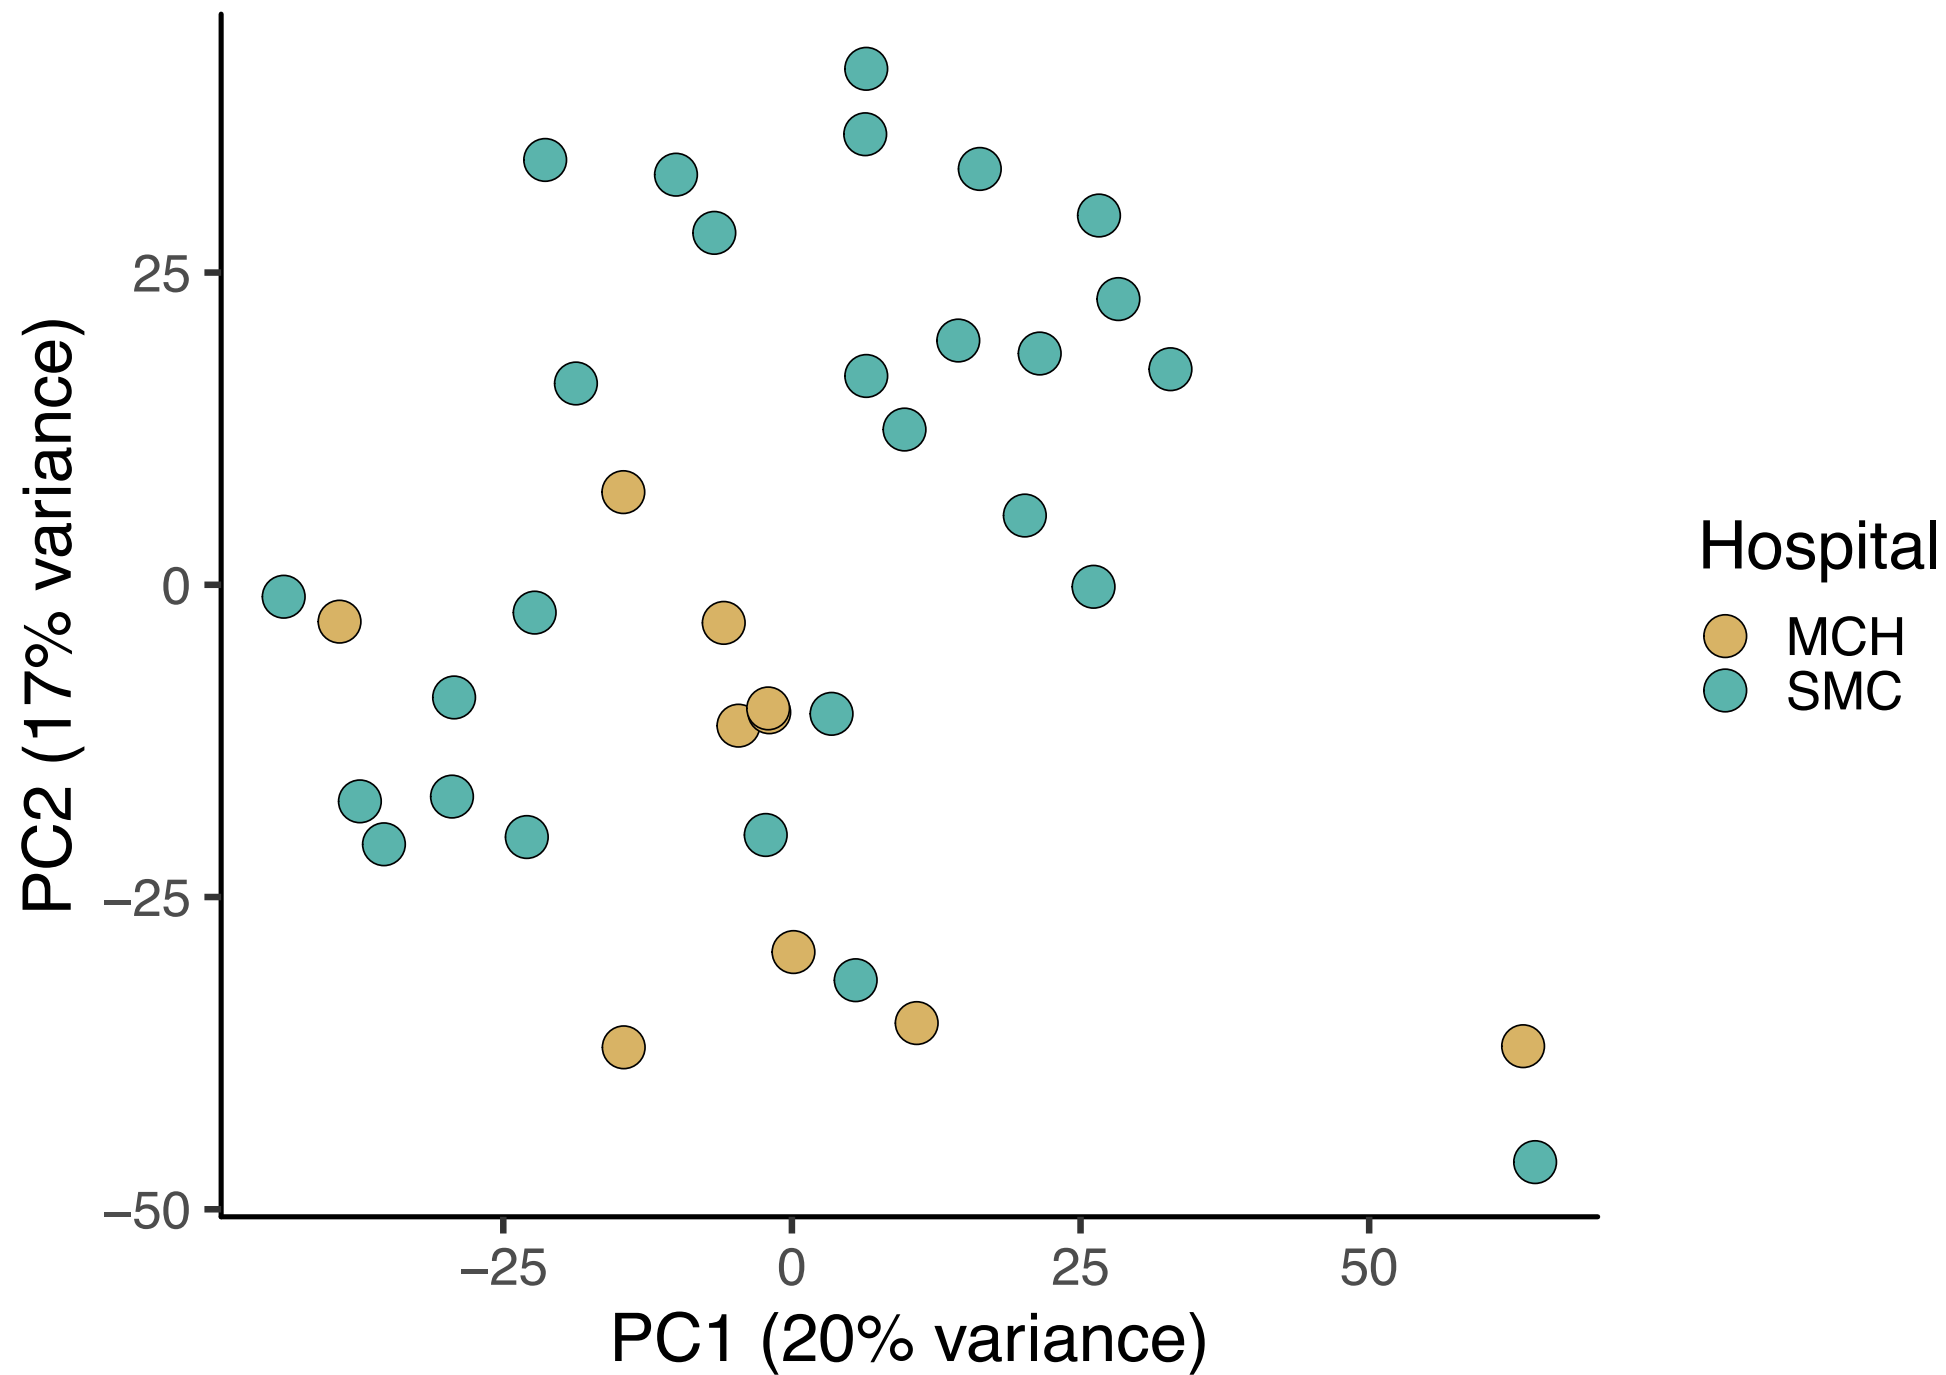

Supplementary Figure S1. PCA by sex

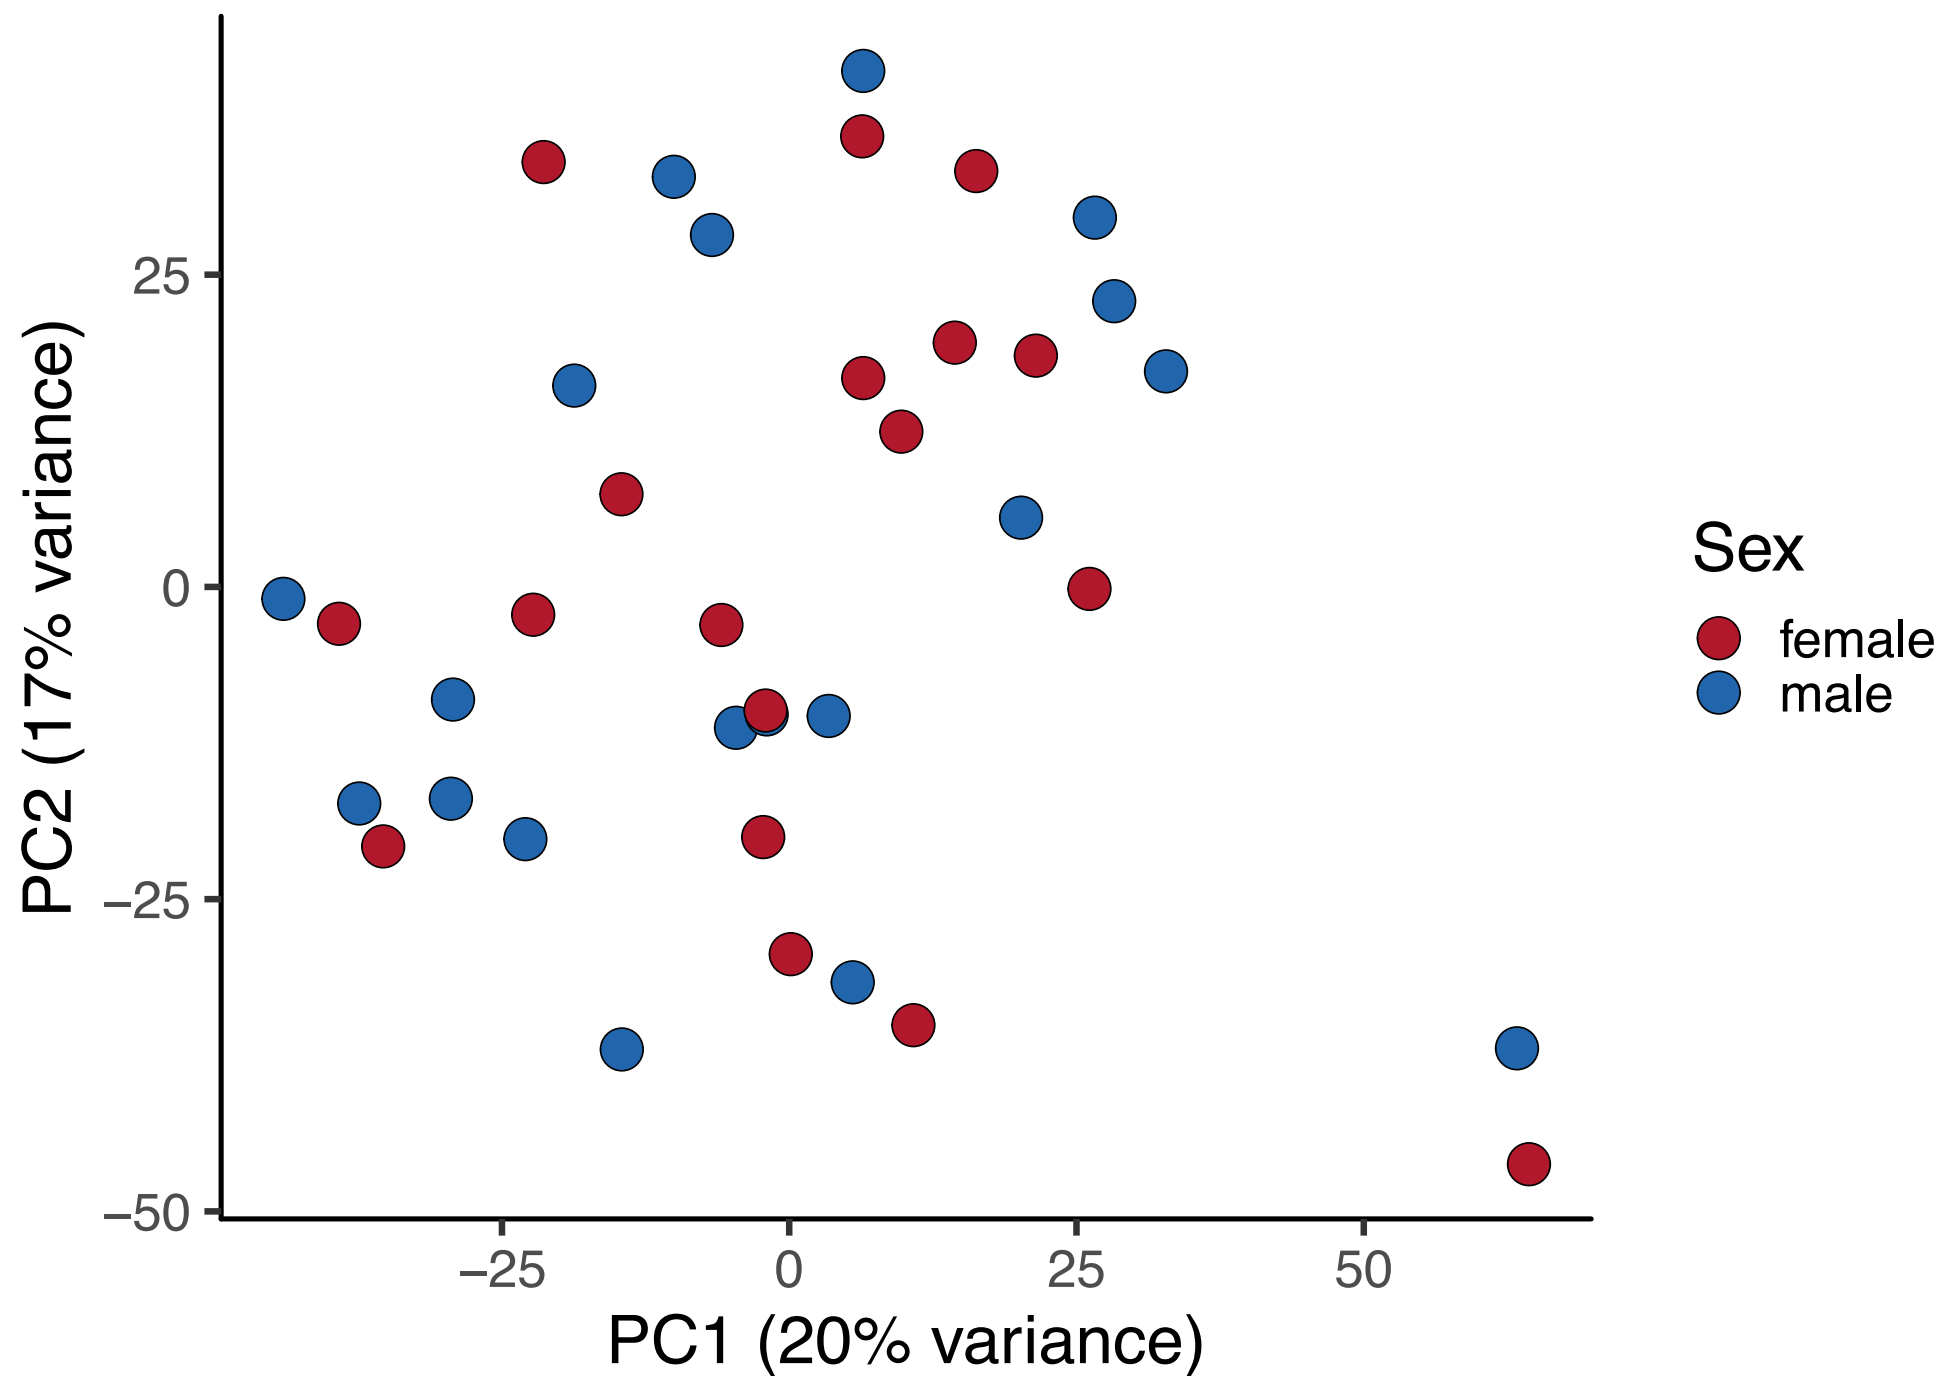

Supplementary Figure S1. PCA by age

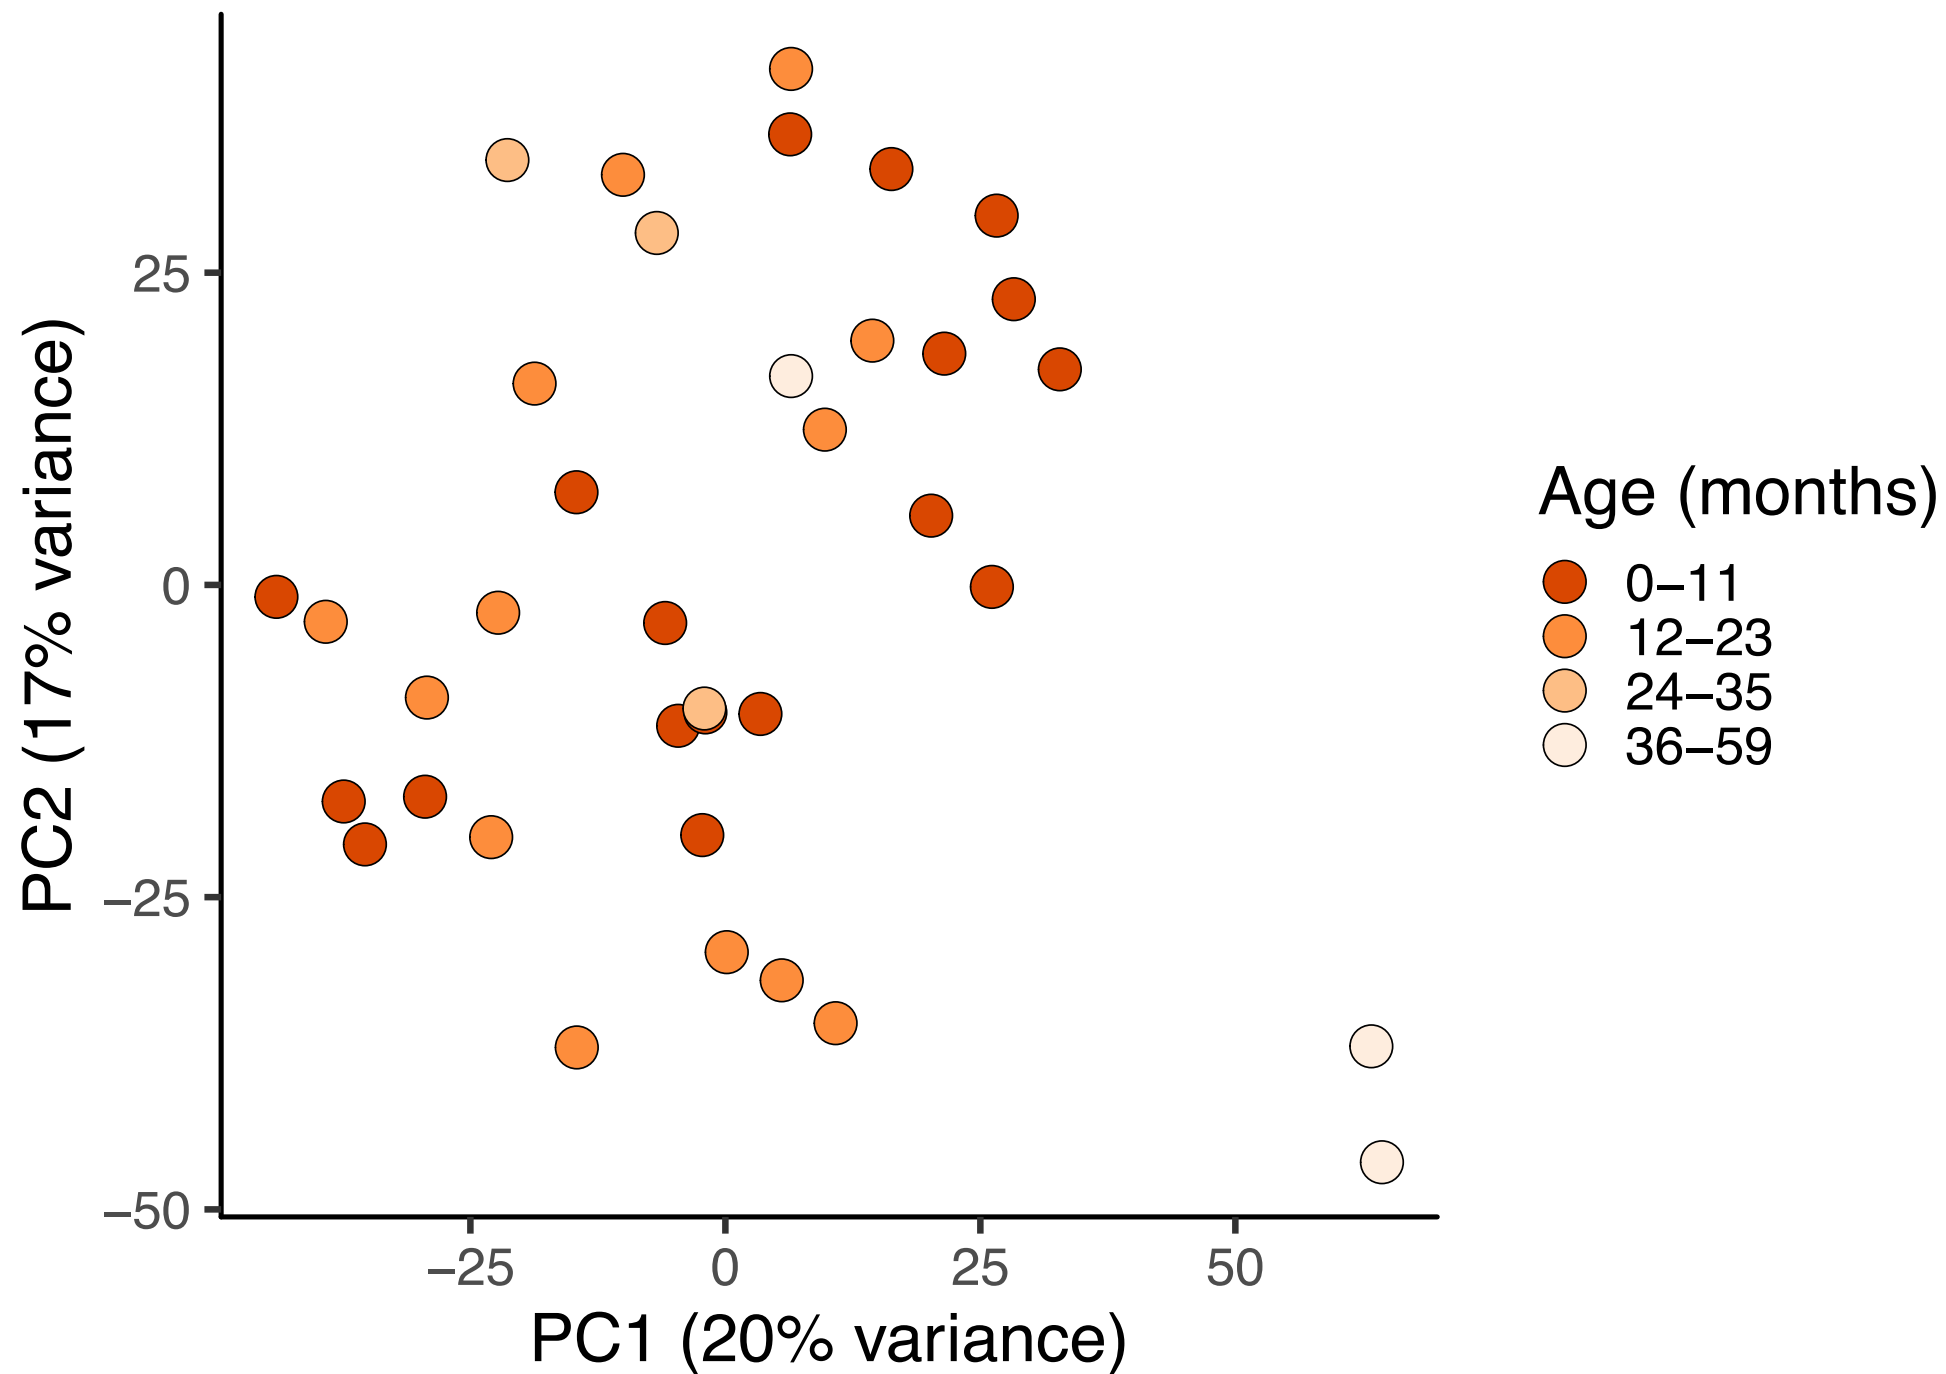

Supplementary Figure S2. Top and bottom PC loadings

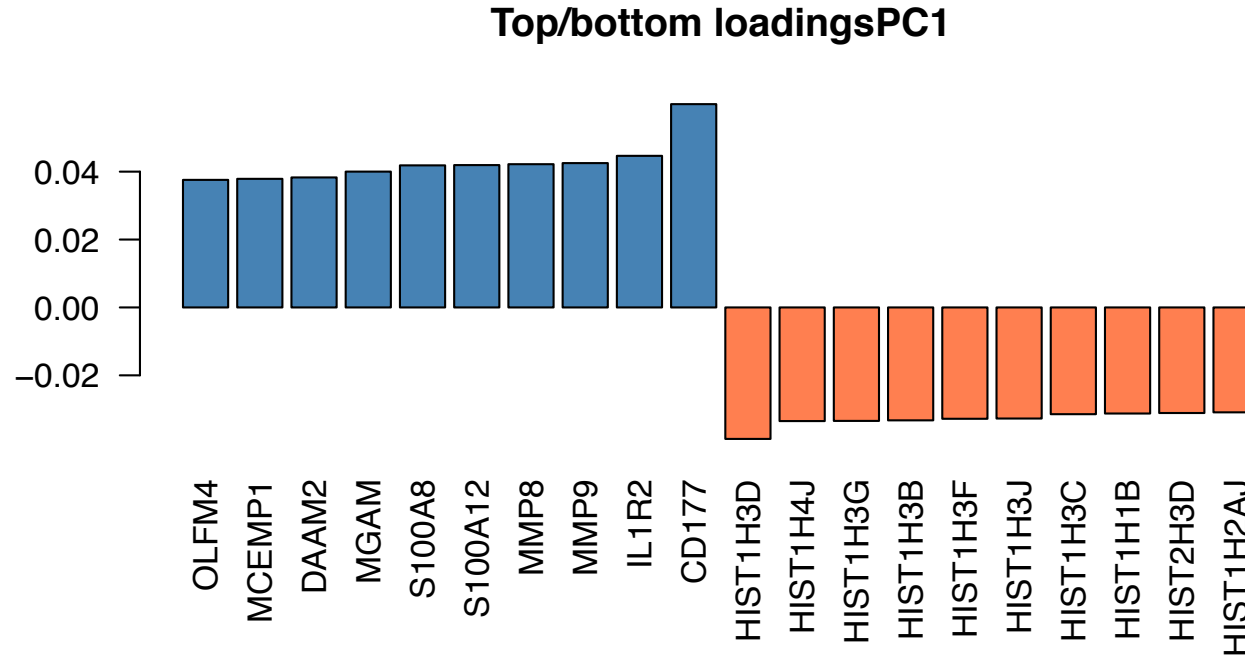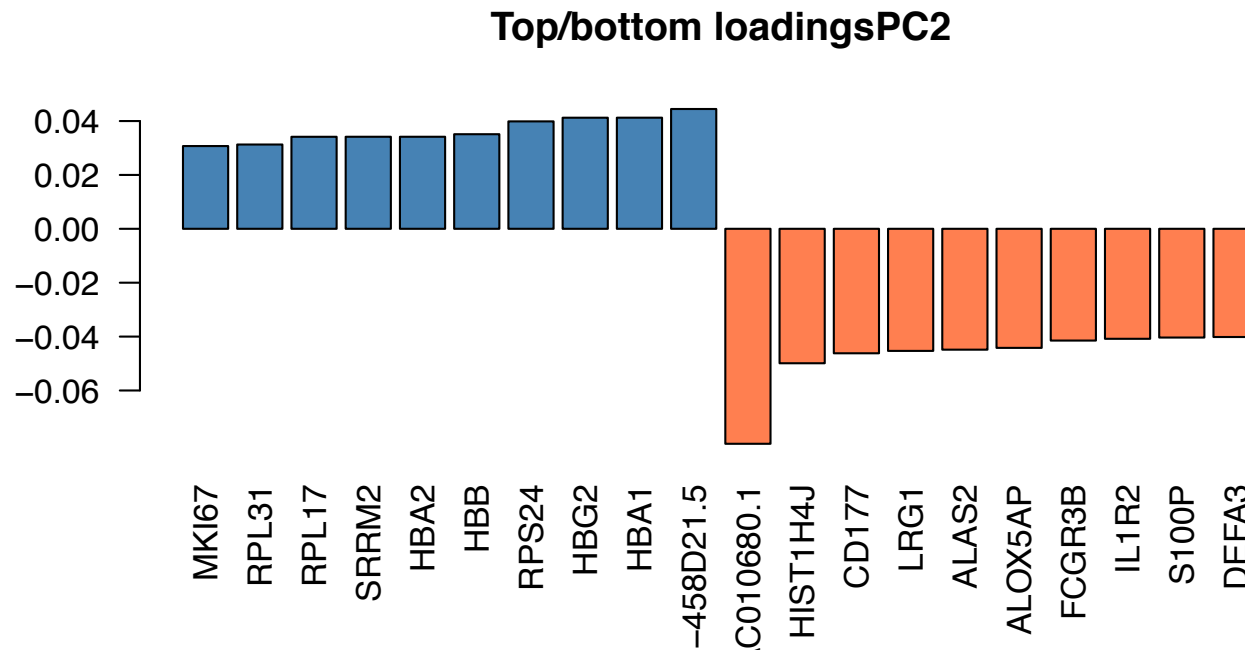

# Supplementary Figure S3. MCODE analysis

## A. rRNA processing

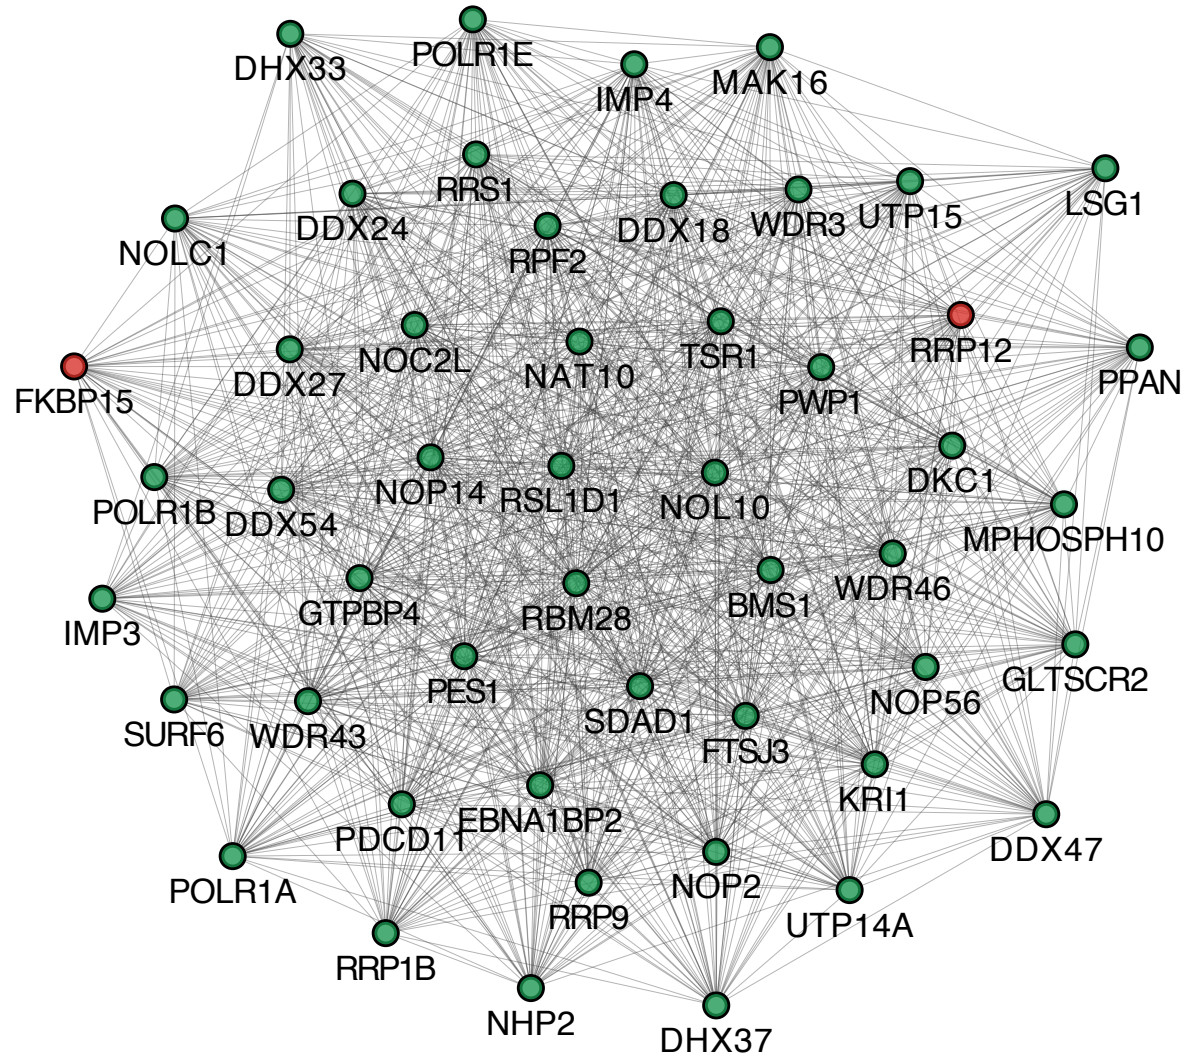

# Supplementary Figure S3. MCODE analysis

## B. protein ubiquitination

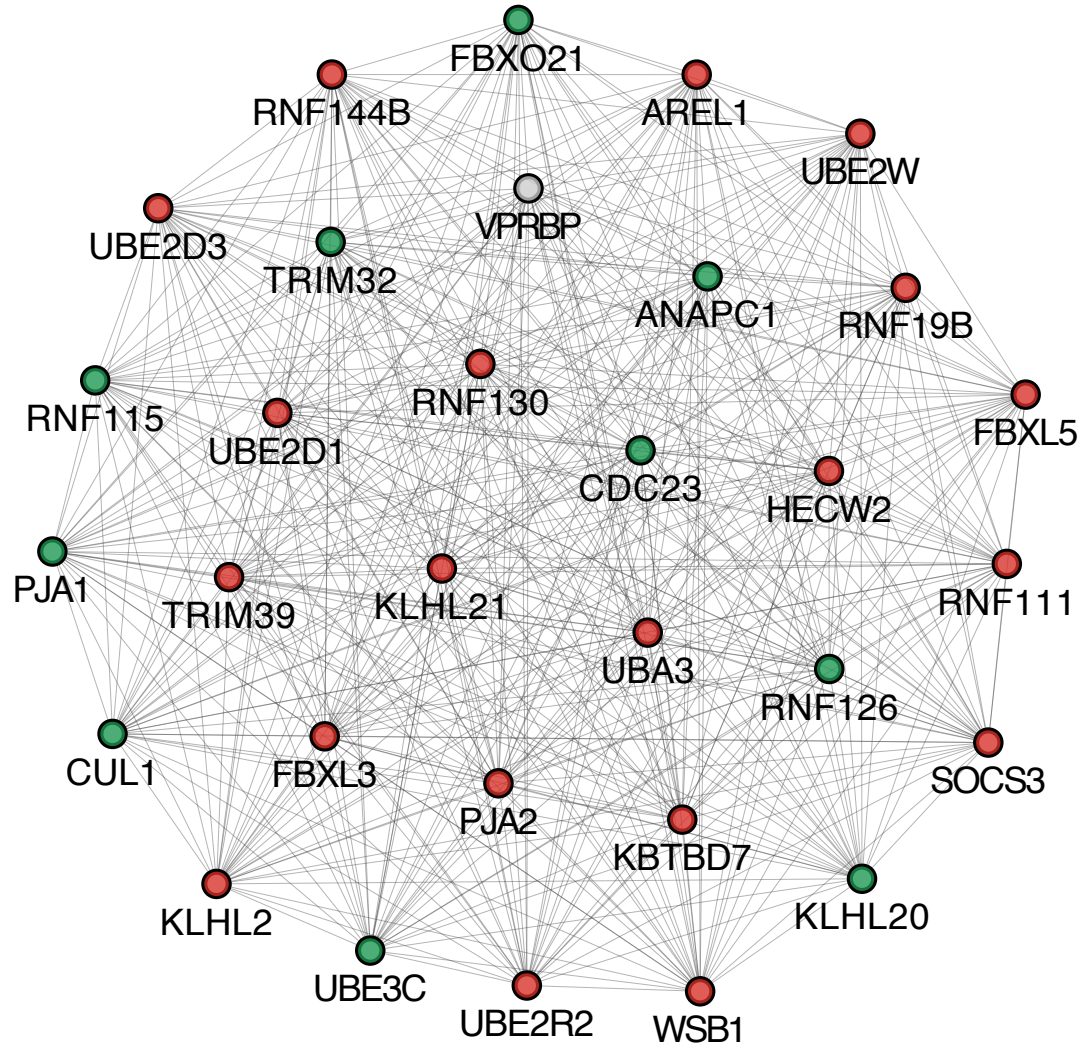



# Supplementary Figure S3. MCODE analysis

## C. blood coagulation

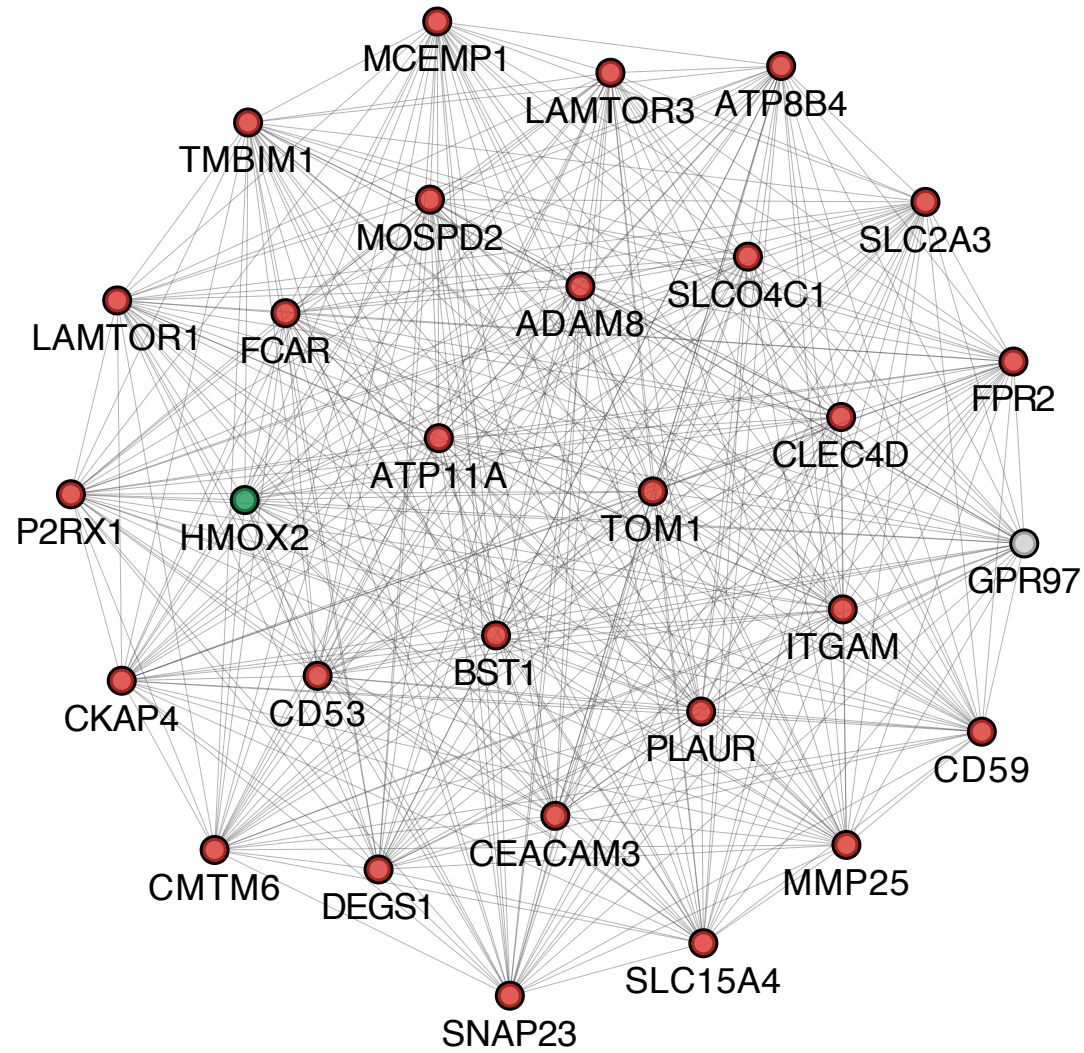

# Supplementary Figure S3. MCODE analysis

## D. RNA splicing

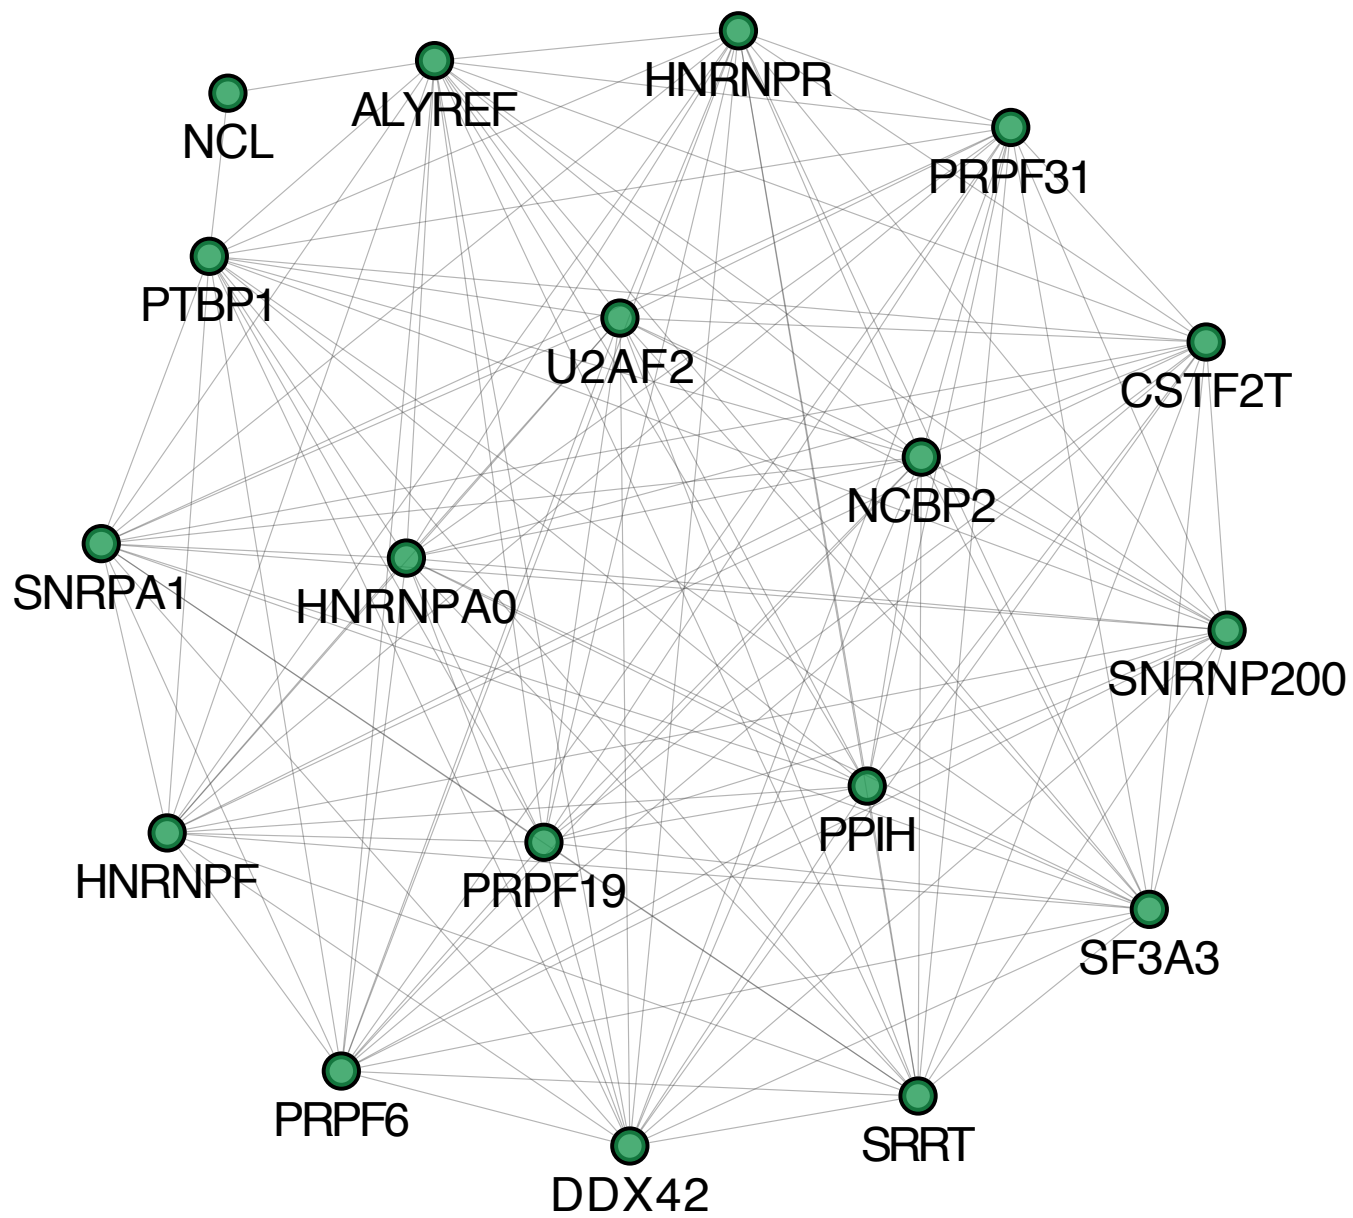

# Supplementary Figure S3. MCODE analysis

## E. chemotaxis

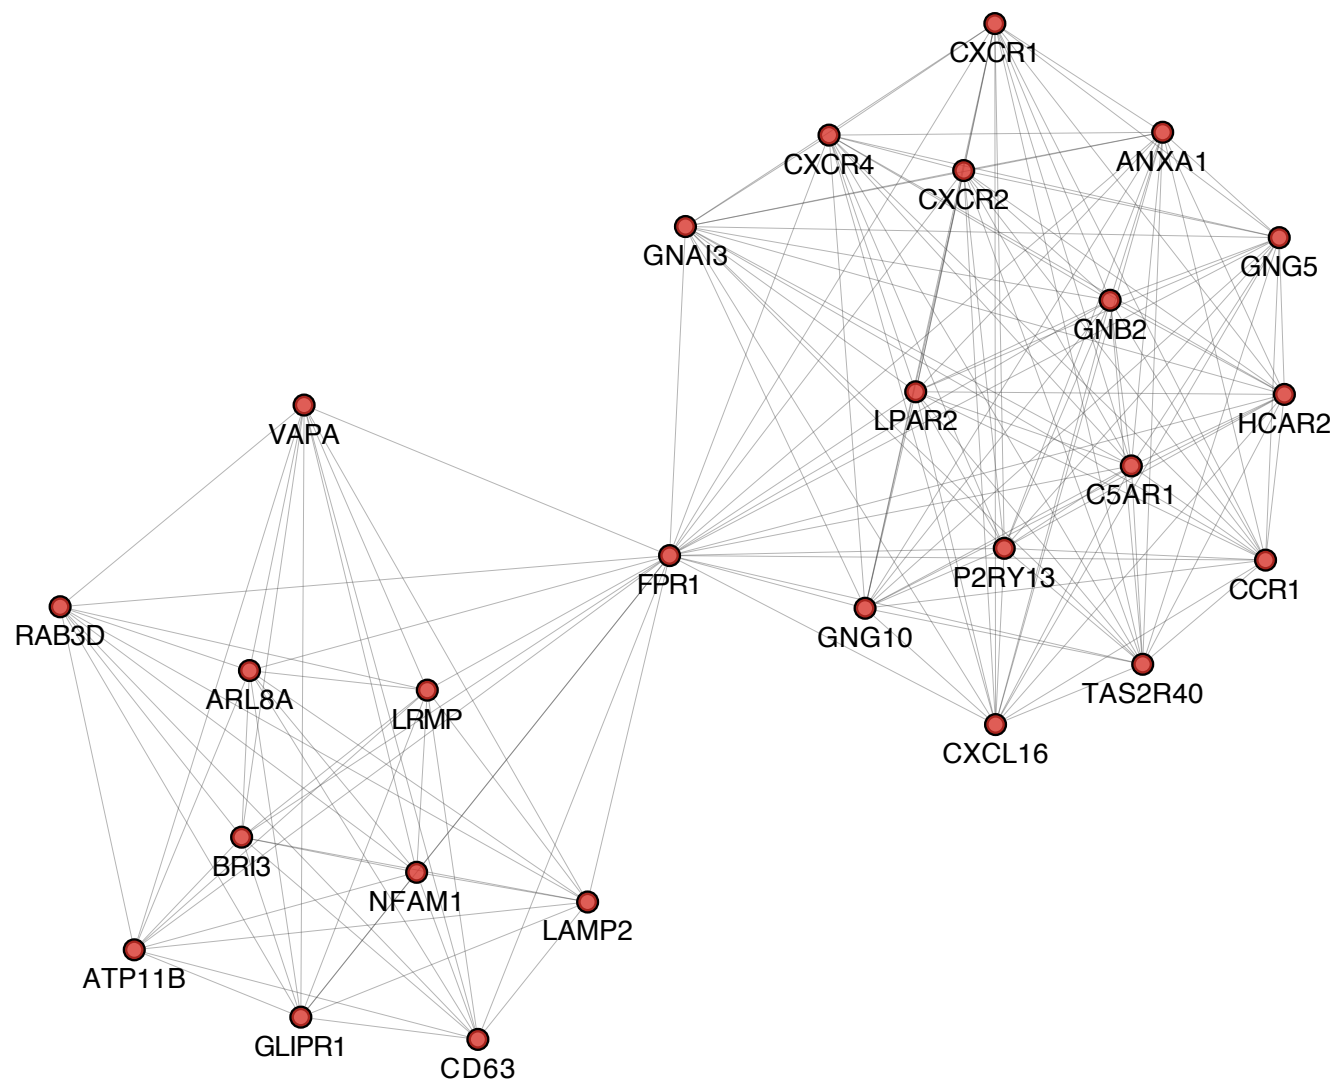

# Supplementary Figure S3. MCODE analysis

## F. cytokine production

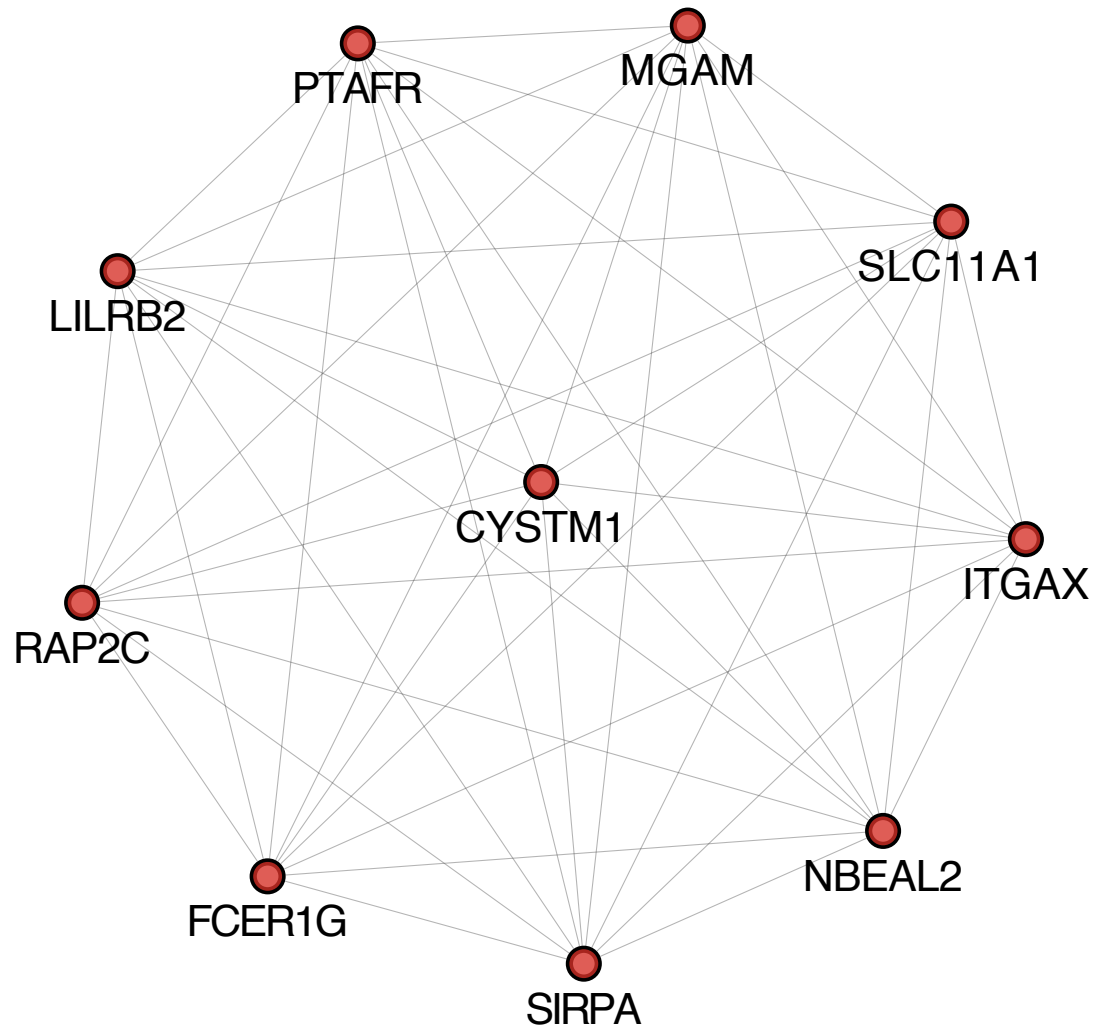

# Supplementary Figure S3. MCODE analysis

## G. lymphocyte proliferation

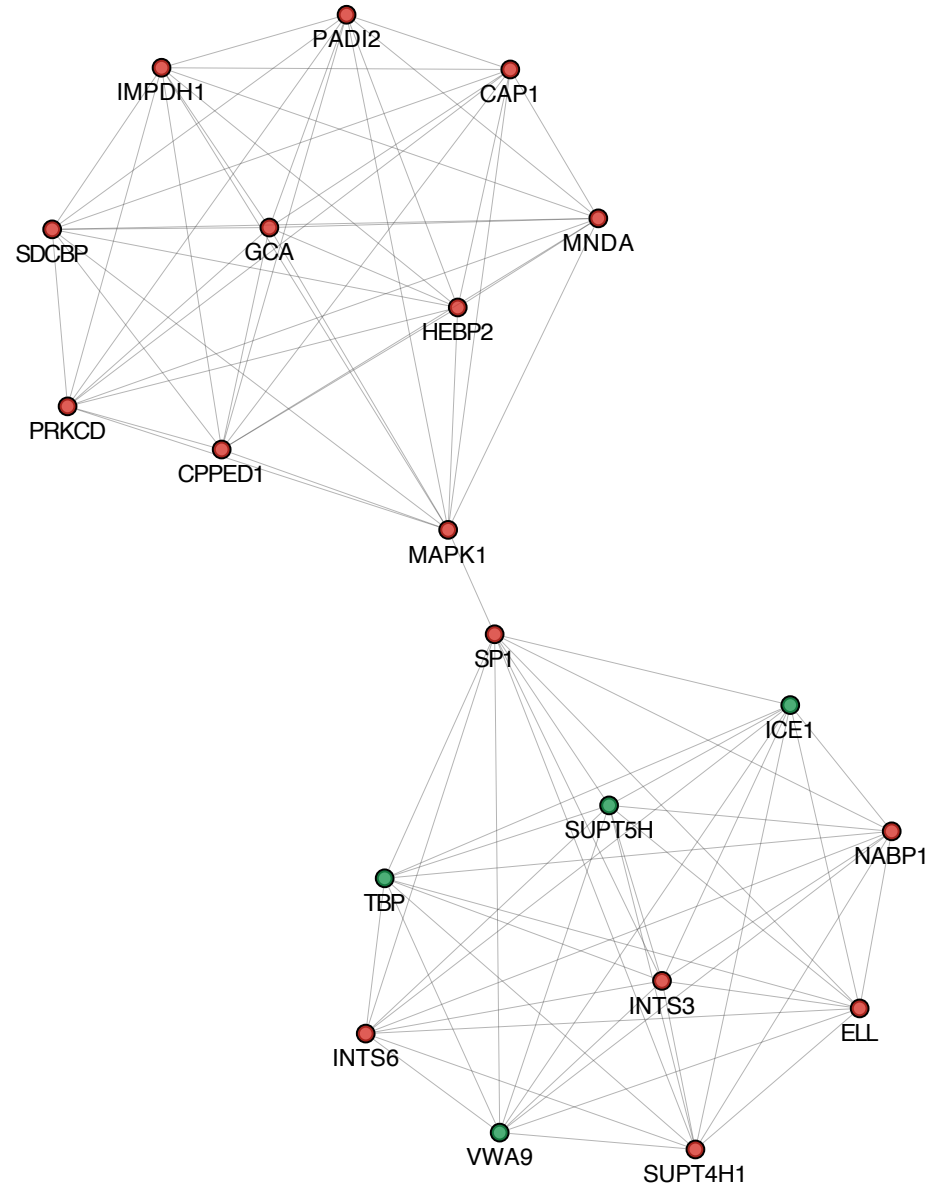

# Supplementary Figure S3. MCODE analysis

## H. T cell receptor signaling

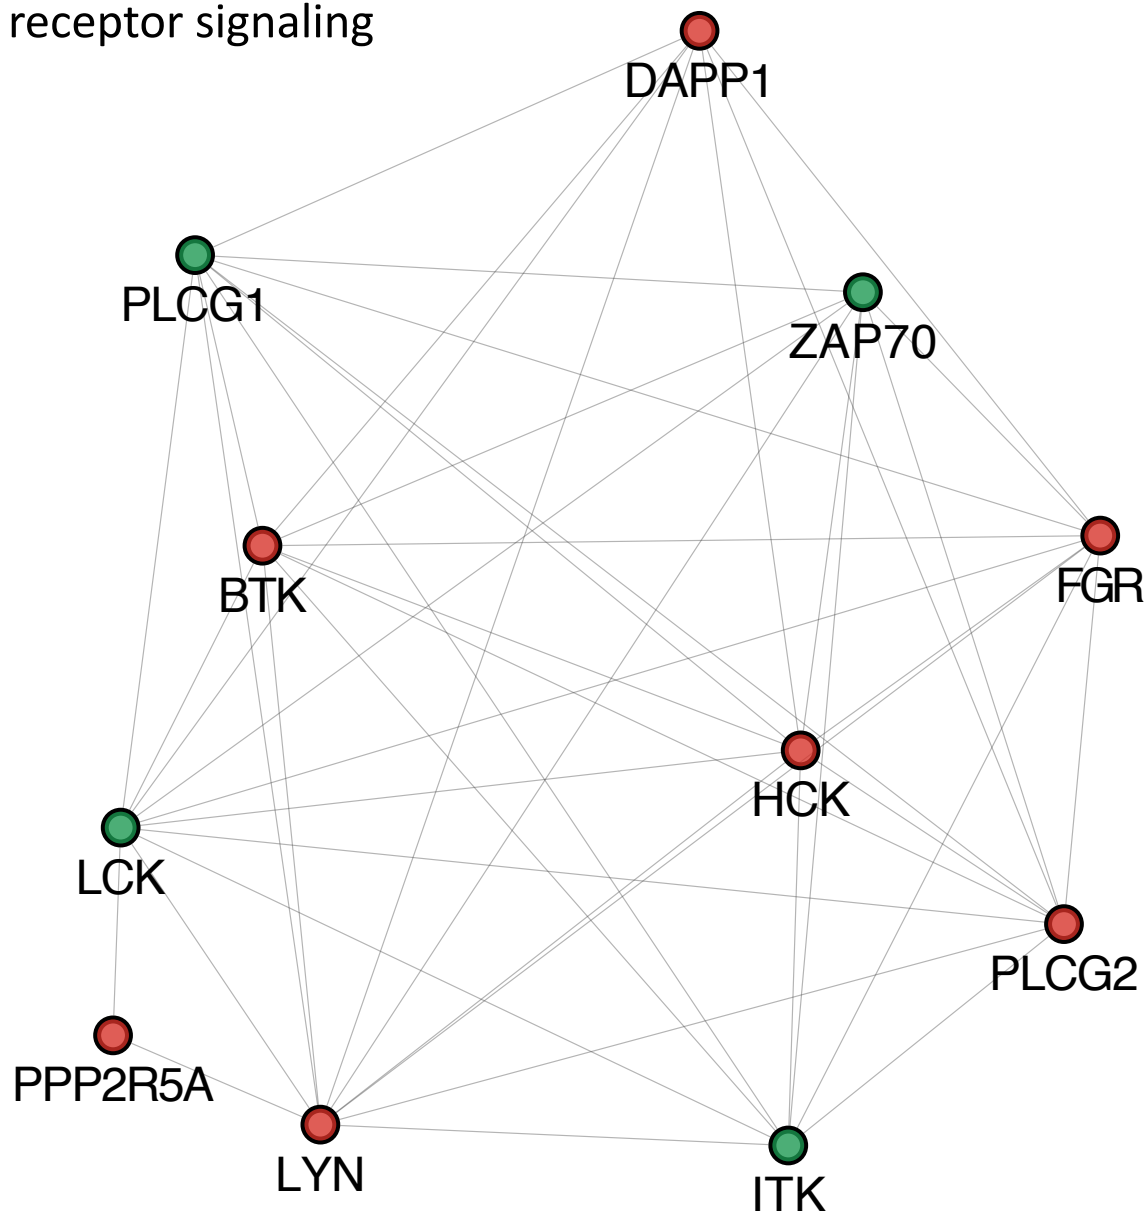

# Supplementary Figure S3. MCODE analysis

I. cell cycle

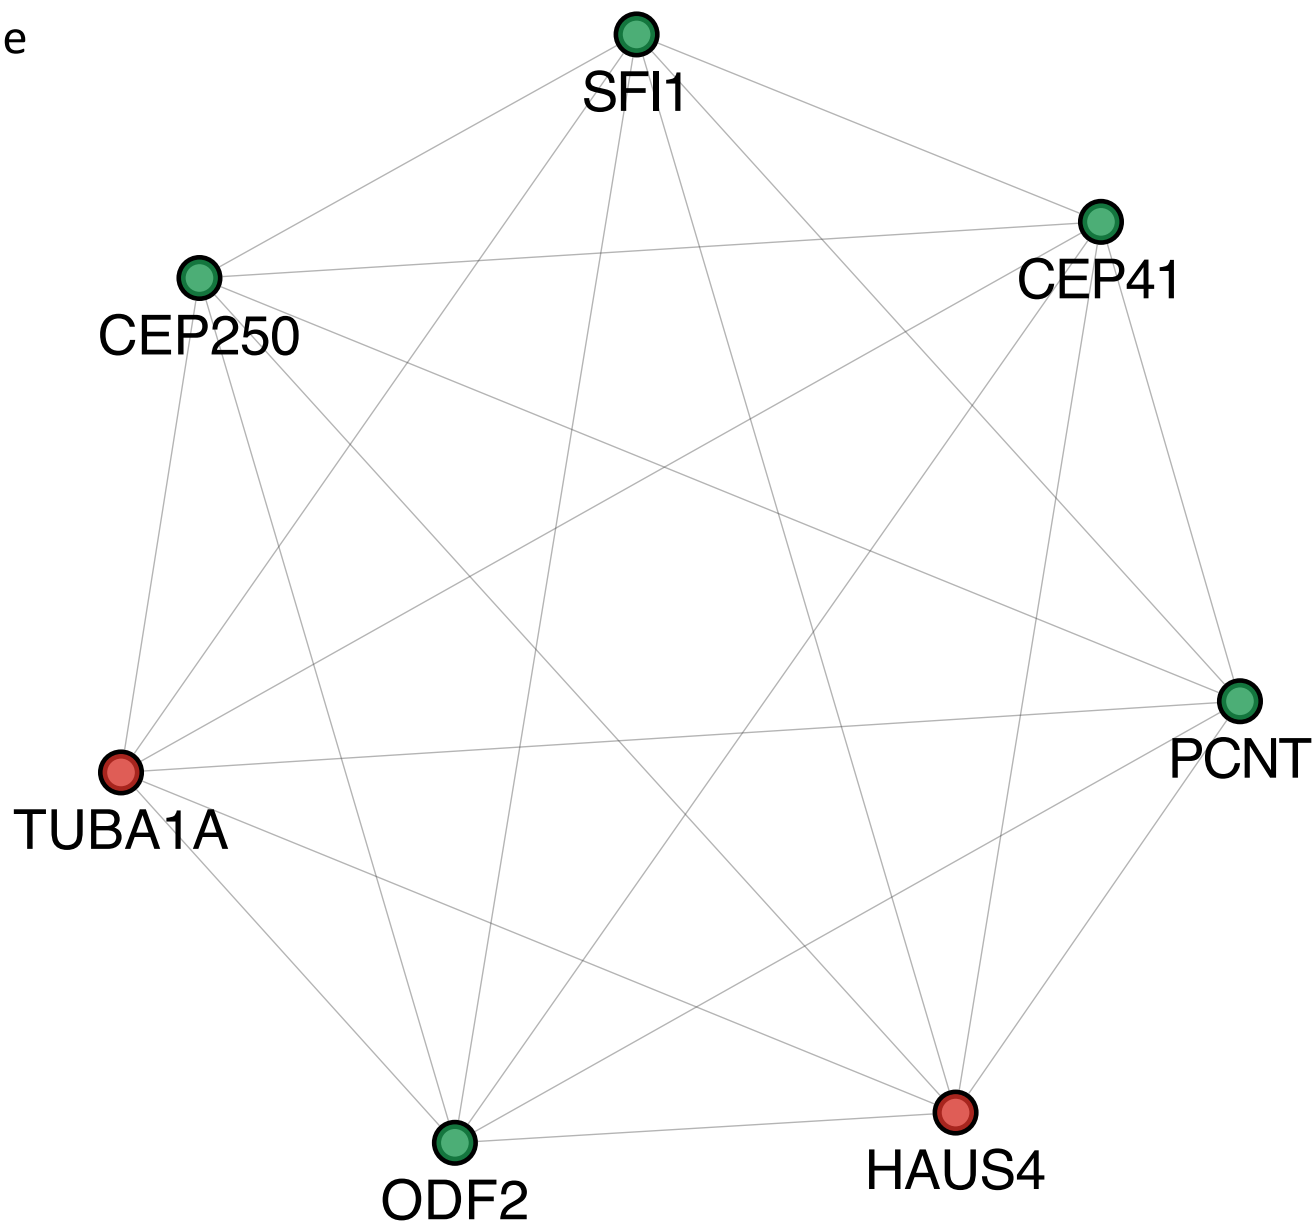

# Supplementary Figure S3. MCODE analysis

J. glycolysis

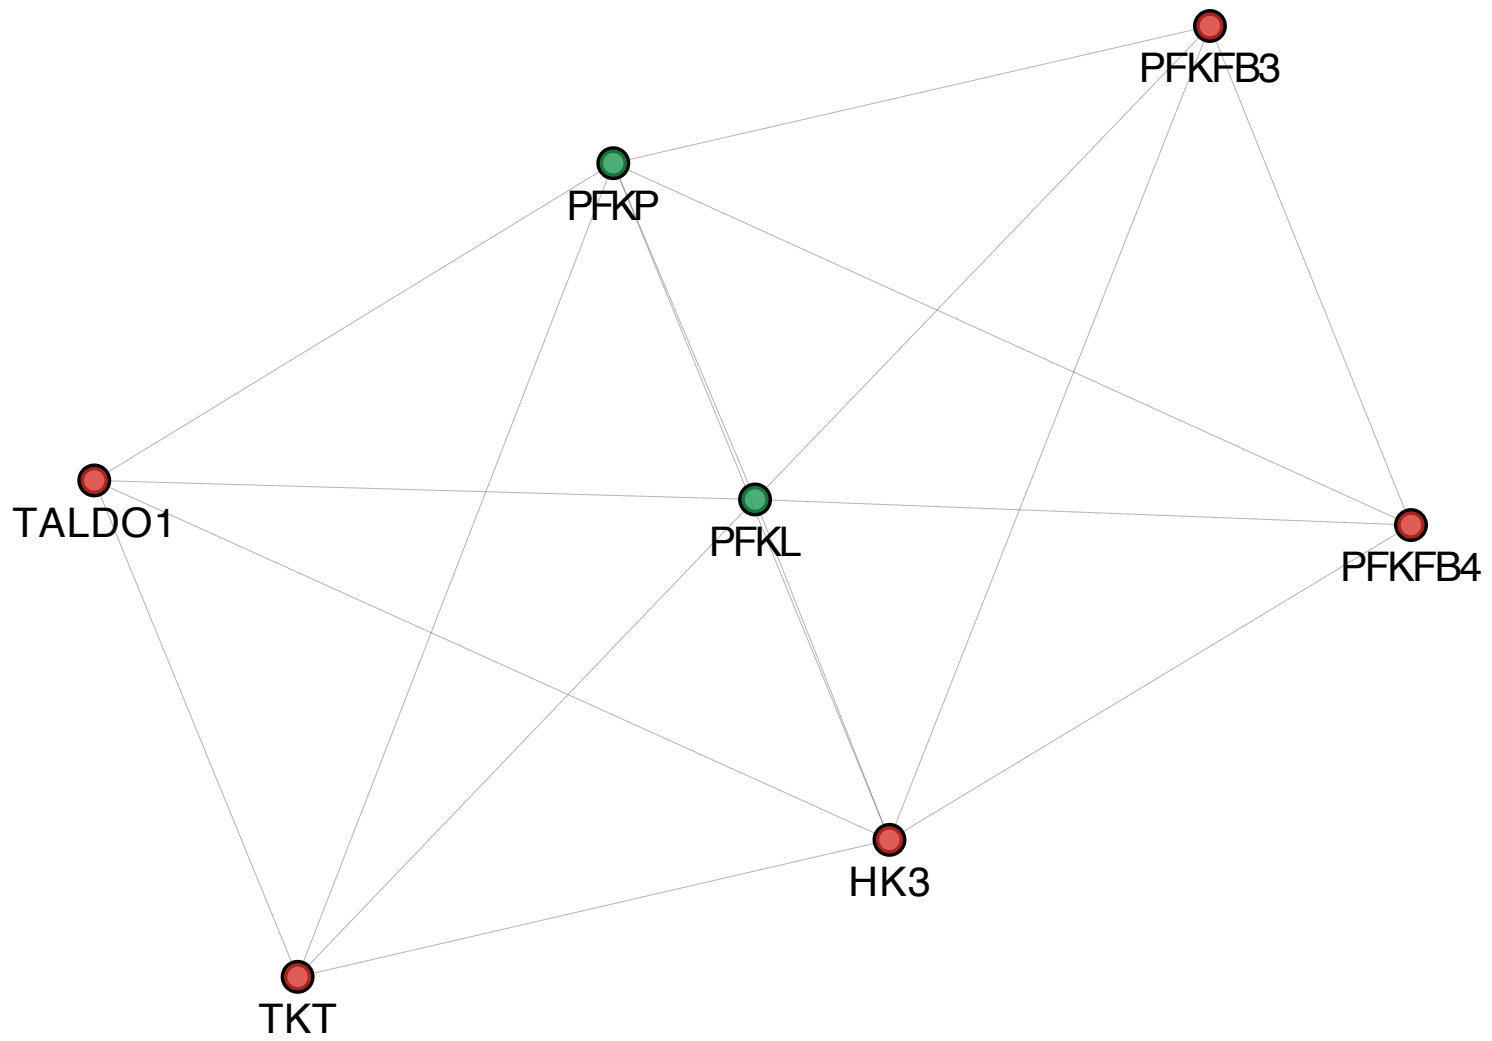



# Supplementary Figure S3. MCODE analysis

## K. G protein-coupled receptor signaling

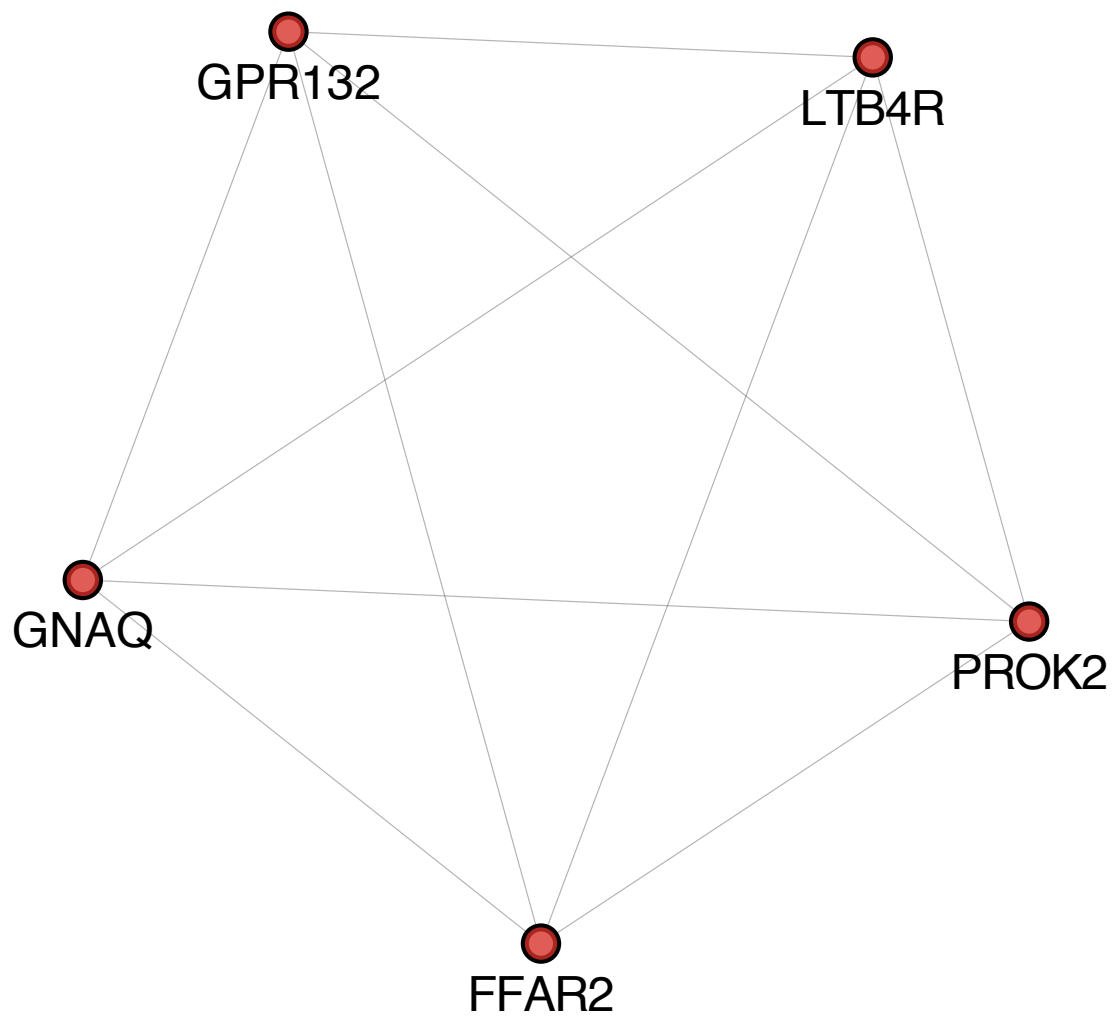

# Supplementary Figure S3. MCODE analysis

## L. T-helper 2 (Th2) cell differentiation

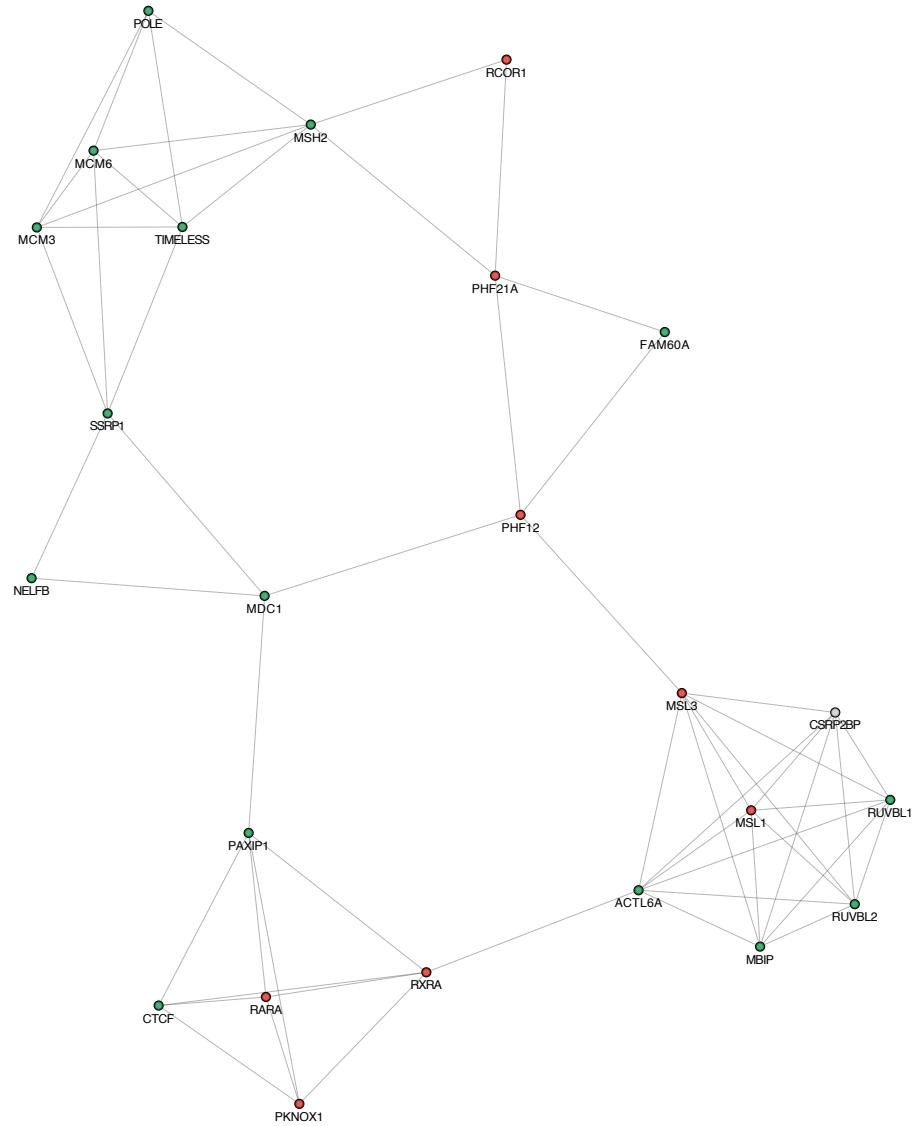

# Supplementary Figure S3. MCODE analysis

## M. ATP synthesis coupled proton transport

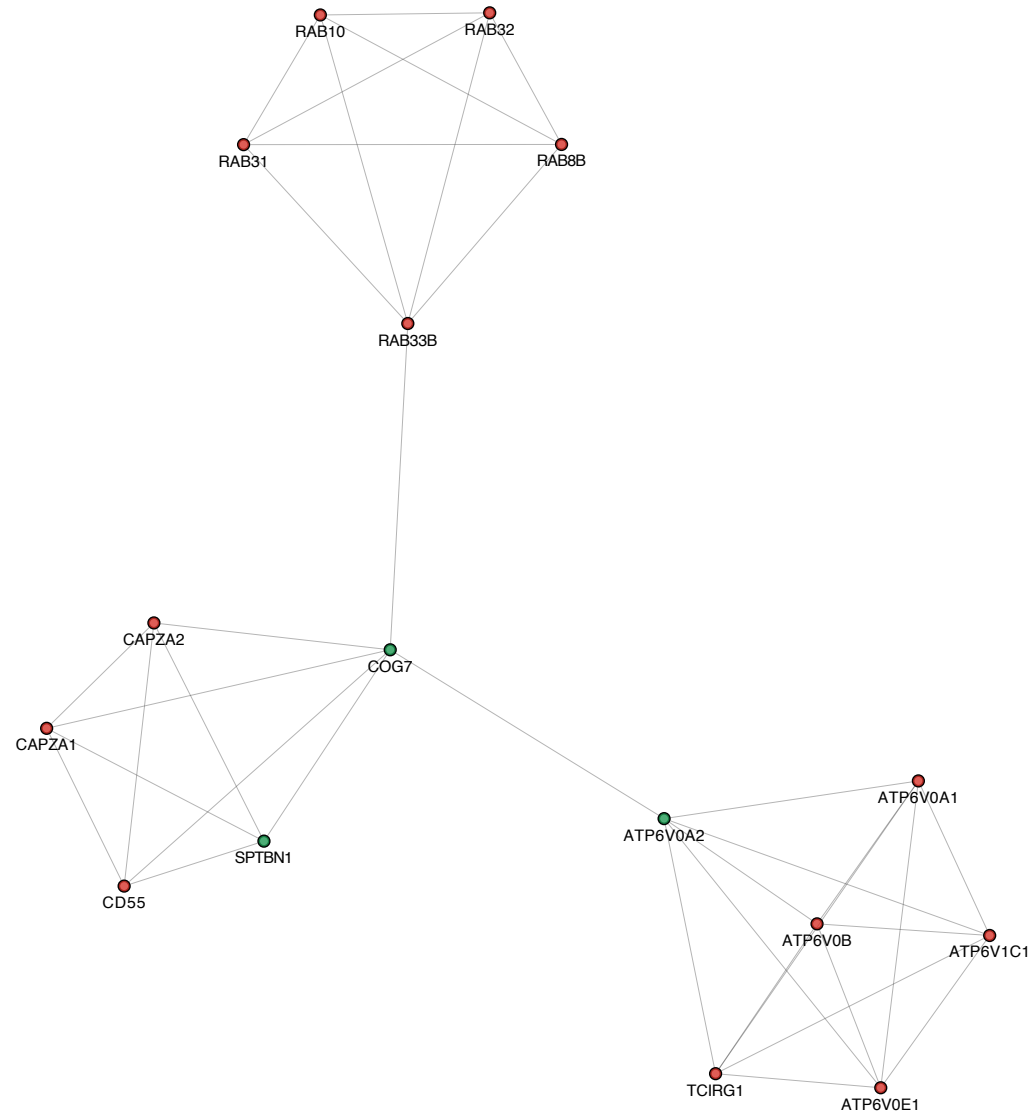

# Supplementary Figure S3. MCODE analysis

## N. Regulation of IL-2 production

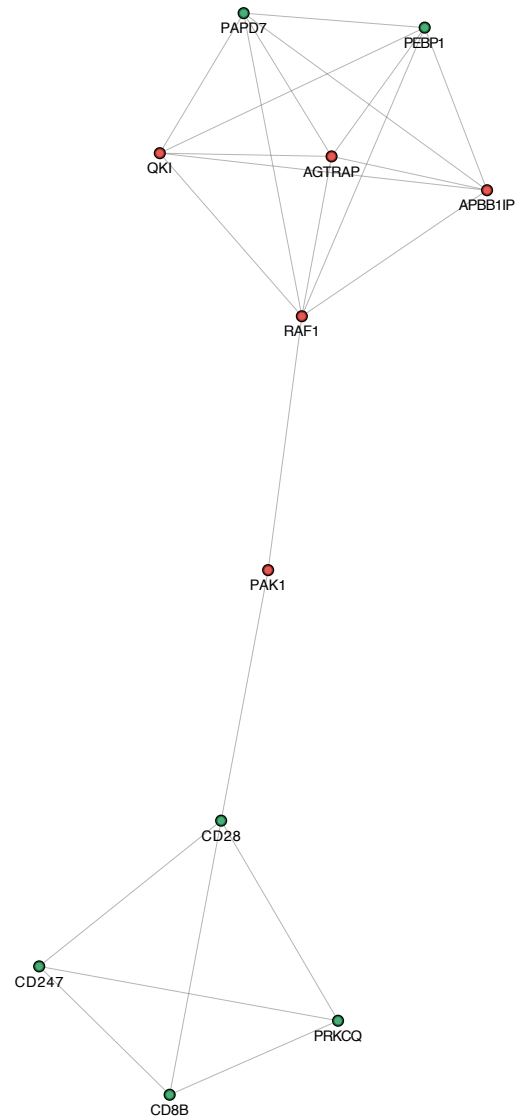

# Supplementary Figure S3. MCODE analysis

## O. RNA catabolic process

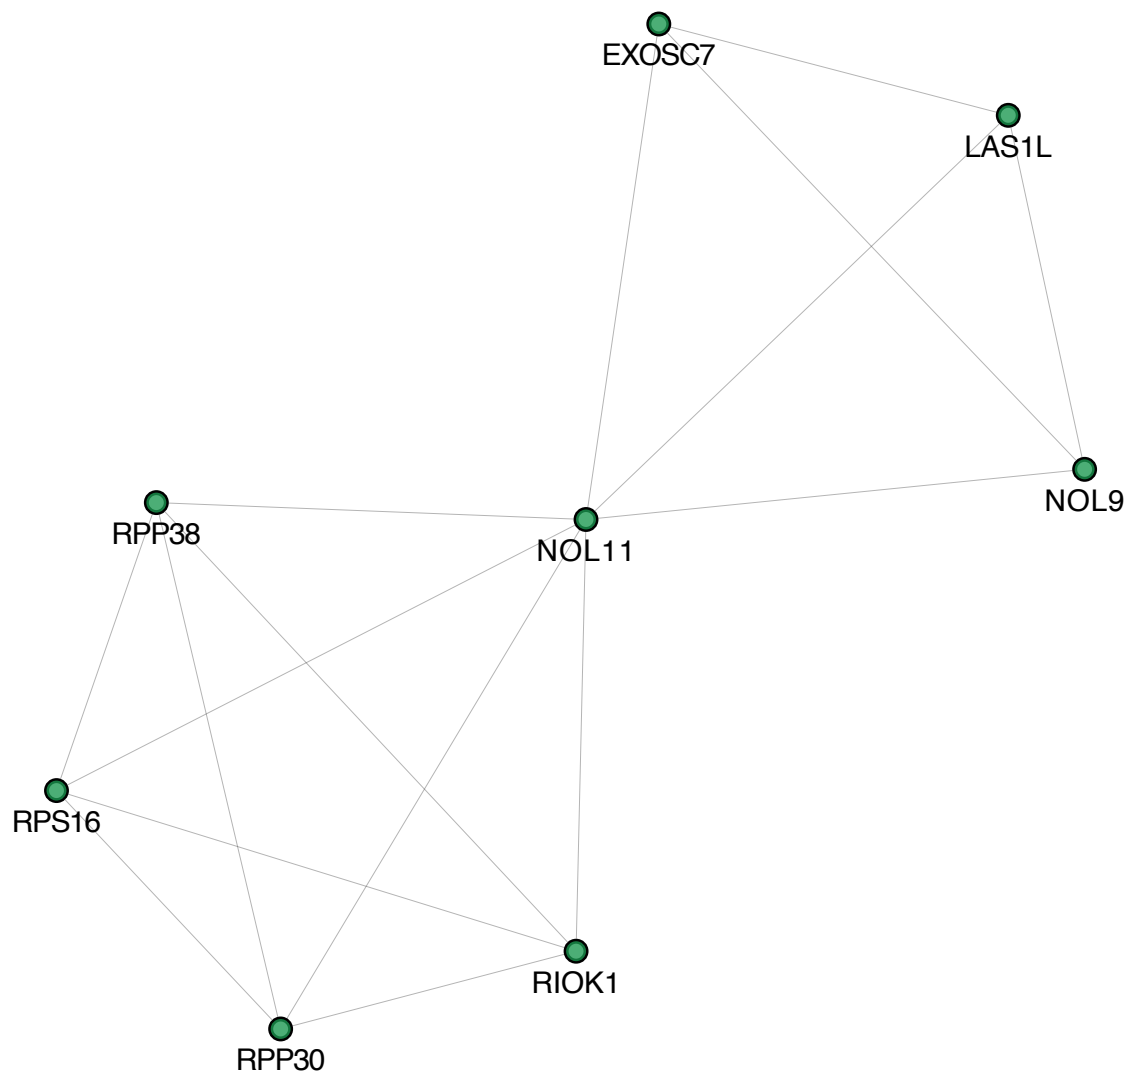

# Supplementary Figure S3. MCODE analysis

P. protein localization

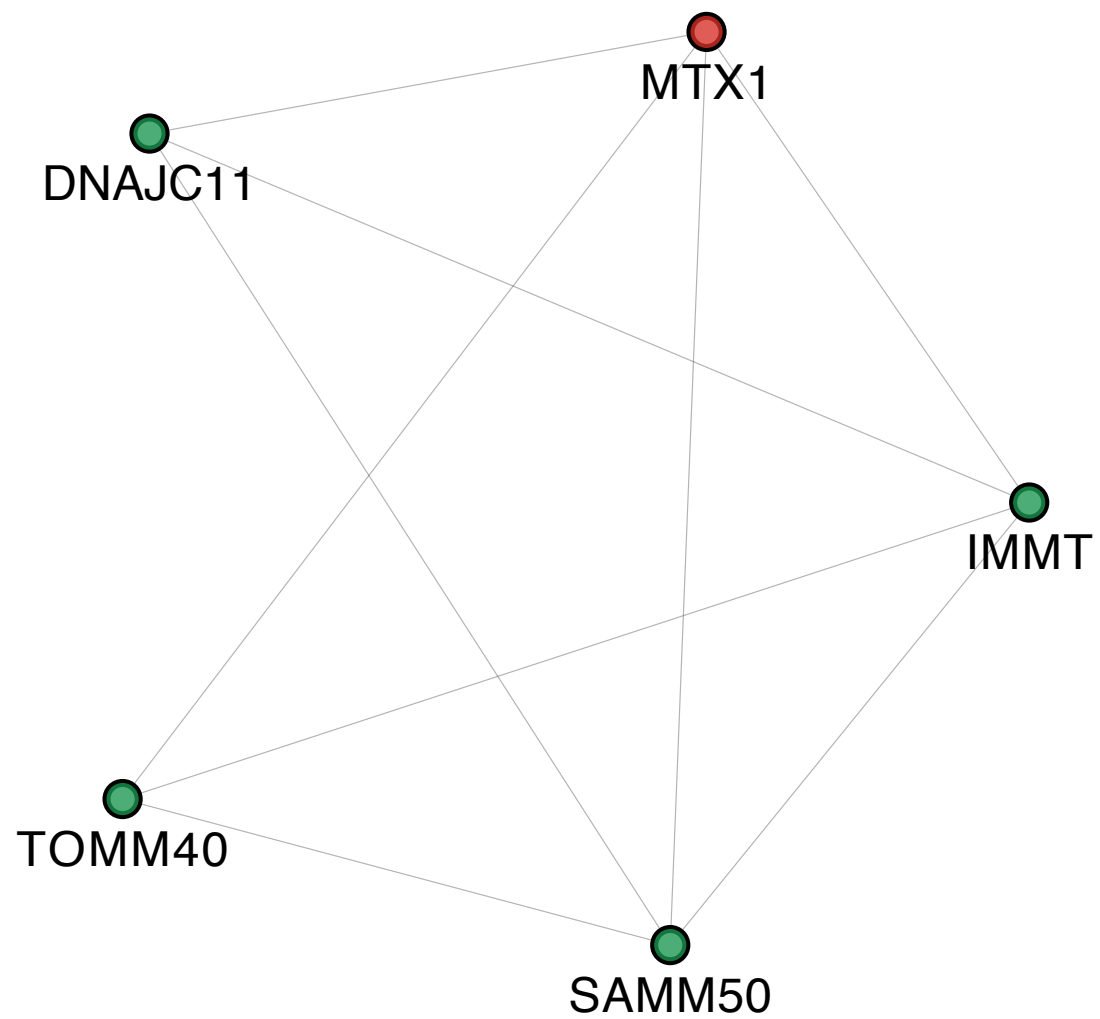

Supplementary Figure S3. MCODE analysis

Q. toll-like receptor signaling

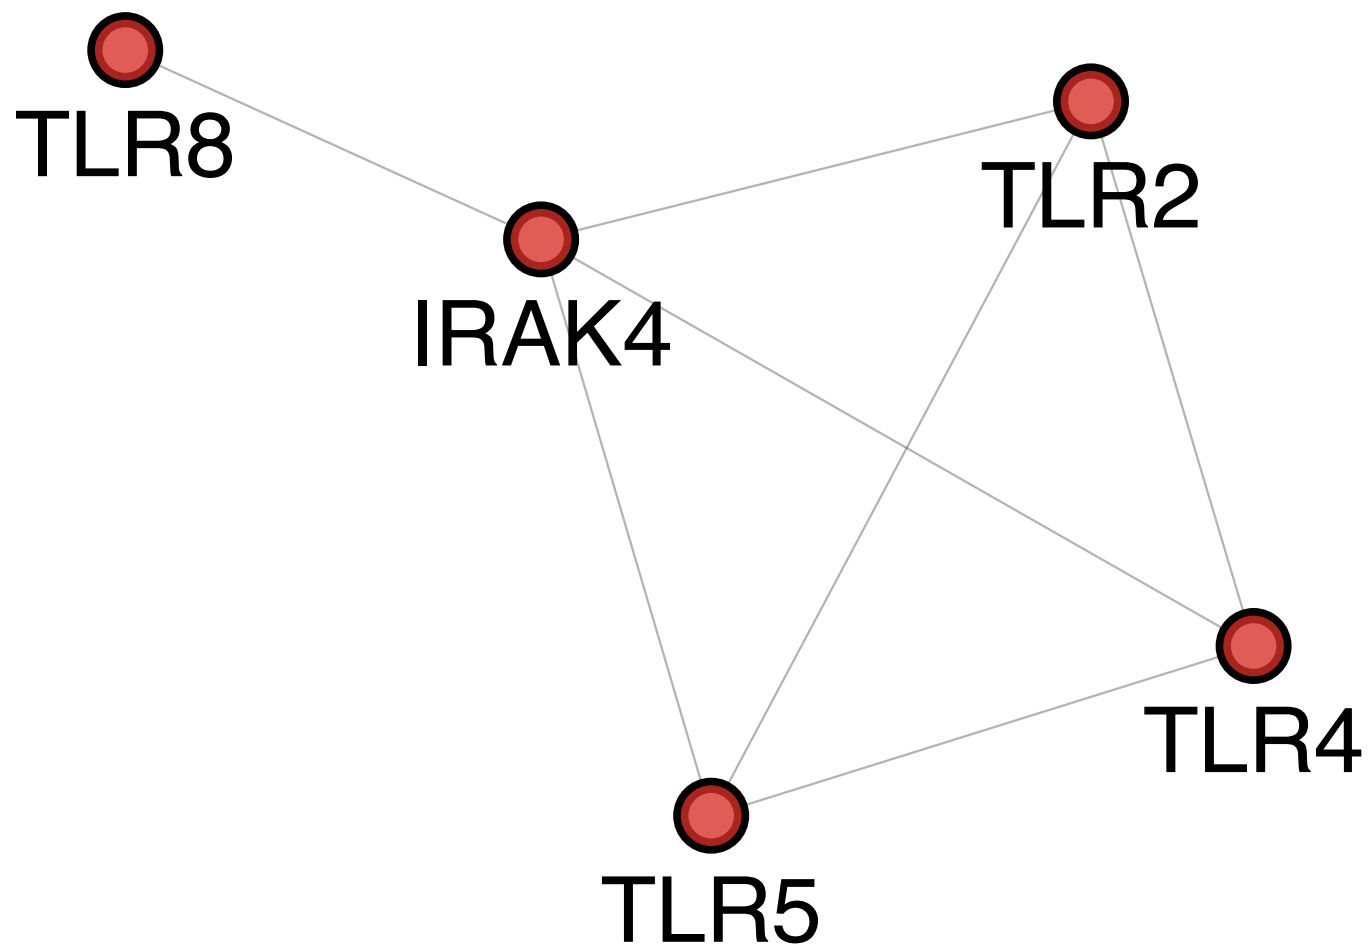

Supplementary Figure S3. MCODE analysis

R. MAPKKK cascade

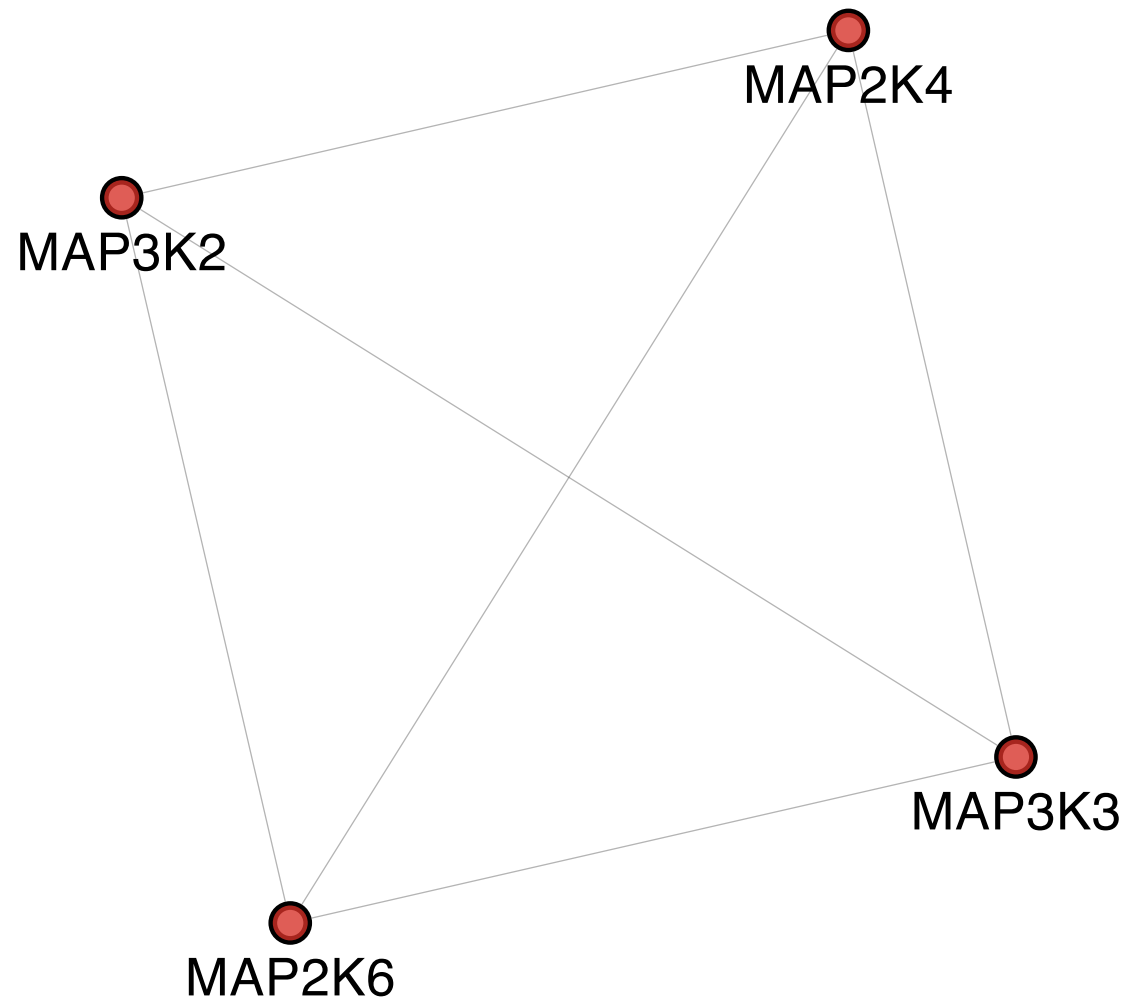

Supplement: 41390_2020_1347_MOESM1_ESM.pdf [file 41390_2020_1347_MOESM1_ESM.pdf]
